# Supplementary material
Source: PubMed Central journal article supplement (PMC3416265)
Supplement: JB.00622-12_zjb999091743so1.pdf [file JB.00622-12_zjb999091743so1.pdf]

Region I

| Accession                               | 45 | 50     | 60       | 70        | 80        | 90        | 100     | 110     | 120     | 124     |        |        |       |        |       |       |       |       |      |     |
|-----------------------------------------|----|--------|----------|-----------|-----------|-----------|---------|---------|---------|---------|--------|--------|-------|--------|-------|-------|-------|-------|------|-----|
| 1-L.plantarum ADN99864                  | 45 | ITTWLS | PIYQSPMV | DNGYDISDY | QAIDSR    | FGTMA     | DFDEL   | MEVTKRL | GLKVI   | LDLVI   | NHTSDQ | HVWF   | QSAI  | TKSPT  | SPYRD | 124   |       |       |      |     |
| 2-L.casei_ATCC_334 ABJ70852             | 49 | ITTWLS | PVYKSPMV | DNGYDISDY | QAIDPR    | FGTMA     | DFDQL   | MATAKDL | GIKVV   | MDLVN   | NHTSDQ | HRWF   | QAAL  | KNPAS  | PYRD  | 128   |       |       |      |     |
| 3-L.rhamosus_ATCC_8530 AER64849         | 49 | VTAI   | WLSPVYR  | SPMV      | DNGYDISDY | QAIDPR    | FGTMA   | DFDQL   | MATAKDL | GIKVV   | MDLVN  | NHTSDQ | HRWF  | QAAL   | KNPAS | PYRD  | 128   |       |      |     |
| 4-E.italicus_DSM_15952 ZP_07895342      | 49 | IDFV   | WLNPIY   | ASPN      | DNGYDISDY | QAIDPR    | FGTMA   | DFDQL   | MATAKDL | GIKVV   | MDLVN  | NHTSDQ | HRWF  | QAAL   | KNPAS | PYRD  | 128   |       |      |     |
| 5-L.sakei_subsp._sakei_23K YP_395811    | 43 | IELI   | WLT      | PMYV      | SPGR      | DNGYDISDY | QAIDPI  | FGLAD   | DFERL   | LKEA    | HQRGI  | KI     | MDM   | VNHTSD | QHRWF | QESL  | KGKDN | PYHD  | 122  |     |
| 6-P.larvae ZP_02329600                  | 45 | VEVI   | WLT      | PIYES     | PKD       | DNGYDISDY | YRIQPE  | YGTMET  | FEEL    | LRQA    | HRLGI  | KI     | MDI   | VNHTSD | HAWFI | EASS  | SKDS  | PLRD  | 124  |     |
| 7-T.halophilus_NBRC_12172 YP_004886688  | 47 | VDV    | WLS      | PVYQ      | SPND      | DNGYDISDY | KAIMSE  | FGTMD   | DLDEL   | MEKI    | HKRGM  | KLI    | MDLV  | NHTSD  | HEHWF | IESR  | SSKDN | LYRD  | 126  |     |
| 8-B.fusum BAB60692                      | 59 | VDV    | WLS      | PVYQ      | SPND      | DNGYDISDY | YSIDPT  | FGTLE   | DLDEL   | IGEL    | HTRGM  | KLV    | MDLV  | NHTSD  | HEHWF | IESR  | SSKDN | LYRD  | 138  |     |
| 9-H.hydrogeniformans YP_003995944       | 45 | VDV    | WLN      | PVYK      | SPND      | DNGYDISDY | RAIMDE  | FGTME   | DEL     | ELI     | ALLK   | ERNI   | KI    | MDLV   | NHTSD | HEHWF | IESR  | SSKDN | LYRD | 124 |
| 10-L.pentosus_IG1 CCC17113              | 45 | VDV    | WLN      | PVYK      | SPND      | DNGYDISDY | QAIDPR  | FGTMA   | DFDQL   | MATAKDL | GIKVV  | MDLVN  | NHTSD | HRWF   | QAAL  | KNPAS | PYRD  | 128   |      |     |
| 11-L.plantarum AD000180                 | 45 | VDV    | WLN      | PVYK      | SPND      | DNGYDISDY | QAIDPR  | FGTMA   | DFDQL   | MATAKDL | GIKVV  | MDLVN  | NHTSD | HRWF   | QAAL  | KNPAS | PYRD  | 128   |      |     |
| 12-L.pentosus_IG1 CCC16900              | 47 | VDV    | WLN      | PVYK      | SPND      | DNGYDISDY | QAIDPR  | FGTMA   | DFDQL   | MATAKDL | GIKVV  | MDLVN  | NHTSD | HRWF   | QAAL  | KNPAS | PYRD  | 128   |      |     |
| 13-L.plantarum ADN97379                 | 47 | VDV    | WLN      | PVYK      | SPND      | DNGYDISDY | QAIDPR  | FGTMA   | DFDQL   | MATAKDL | GIKVV  | MDLVN  | NHTSD | HRWF   | QAAL  | KNPAS | PYRD  | 128   |      |     |
| 14-L.rhamosus_ATCC_8530 AER65504        | 45 | ADV    | WLN      | PVYK      | SPND      | DNGYDISDY | QAIDPR  | FGTMA   | DFDQL   | MATAKDL | GIKVV  | MDLVN  | NHTSD | HRWF   | QAAL  | KNPAS | PYRD  | 128   |      |     |
| 15-L.brevis_ATCC_367 ABJ65230           | 45 | ADV    | WLN      | PVYK      | SPND      | DNGYDISDY | QAIDPR  | FGTMA   | DFDQL   | MATAKDL | GIKVV  | MDLVN  | NHTSD | HRWF   | QAAL  | KNPAS | PYRD  | 128   |      |     |
| 16-L.pentosus_IG1 CCC16895              | 45 | ADV    | WLN      | PVYK      | SPND      | DNGYDISDY | QAIDPR  | FGTMA   | DFDQL   | MATAKDL | GIKVV  | MDLVN  | NHTSD | HRWF   | QAAL  | KNPAS | PYRD  | 128   |      |     |
| 17-L.plantarum ADN97381                 | 45 | ADV    | WLN      | PVYK      | SPND      | DNGYDISDY | QAIDPR  | FGTMA   | DFDQL   | MATAKDL | GIKVV  | MDLVN  | NHTSD | HRWF   | QAAL  | KNPAS | PYRD  | 128   |      |     |
| 18-R.lactaris_ATCC_29176 ZP_03168755    | 53 | VDV    | WLN      | PVYK      | SPND      | DNGYDISDY | REI     | IEPT    | LGTME   | DFEN    | LAE    | AHEA   | GLKI  | LDLV   | NHTSD | QHPWF | QESL  | KGKDN | PYSD | 132 |
| 19-D._formicigenerans ZP_02235523       | 52 | VDV    | WLN      | PVYK      | SPND      | DNGYDISDY | YRIQPE  | YGTMET  | FEEL    | LRQA    | HRLGI  | KI     | MDI   | VNHTSD | HAWFI | EASS  | SKDS  | PLRD  | 131  |     |
| 20-R.torques_ATCC_27756 ZP_01967024     | 50 | VDV    | WLN      | PVYK      | SPND      | DNGYDISDY | YRIQPE  | YGTMET  | FEEL    | LRQA    | HRLGI  | KI     | MDI   | VNHTSD | HAWFI | EASS  | SKDS  | PLRD  | 131  |     |
| 21-B.coagulans BAA11354 O16G            | 44 | IDC    | WIS      | SPVYD     | SPQD      | DNGYDISDY | YRIQPE  | YGTMET  | FEEL    | LRQA    | HRLGI  | KI     | MDI   | VNHTSD | HAWFI | EASS  | SKDS  | PLRD  | 131  |     |
| 22-F.prausnitzii_L2-6 CBK98455          | 45 | VNV    | WLC      | PI        | MDSP      | DNGYDISDY | QAIDPR  | FGTMA   | DFDQL   | MATAKDL | GIKVV  | MDLVN  | NHTSD | HRWF   | QAAL  | KNPAS | PYRD  | 128   |      |     |
| 23-L.sakei_subsp._sakei_23K CAI56099    | 45 | VNAI   | WLS      | PVYK      | SPND      | DNGYDISDY | QAIDPR  | FGTMA   | DFDQL   | MATAKDL | GIKVV  | MDLVN  | NHTSD | HRWF   | QAAL  | KNPAS | PYRD  | 128   |      |     |
| 24-C.leptum_DSM_753 ZP_02079428         | 69 | VDV    | WLS      | PVYQ      | SPND      | DNGYDISDY | RAIMKD  | FGTME   | DFERL   | CEA     | HKRGL  | RIV    | MDLV  | NHTSD  | HEHWF | IESR  | SSKDN | LYRD  | 148  |     |
| 25-S.mutans AA26939 G16G                | 45 | VMAI   | WLS      | PVYD      | SPMD      | DNGYDISDY | YRIQPE  | YGTMET  | FEEL    | LRQA    | HRLGI  | KI     | MDI   | VNHTSD | HAWFI | EASS  | SKDS  | PLRD  | 131  |     |
| 26-S.mitis_bv._2_str._F0392 EGR94186    | 46 | ITA    | WLS      | PVYD      | SPMD      | DNGYDISDY | YRIQPE  | YGTMET  | FEEL    | LRQA    | HRLGI  | KI     | MDI   | VNHTSD | HAWFI | EASS  | SKDS  | PLRD  | 131  |     |
| 27-L.pseudomesenteroides ZP_08659173    | 45 | VDV    | WLN      | PVYK      | SPND      | DNGYDISDY | QAIDPR  | FGTMA   | DFDQL   | MATAKDL | GIKVV  | MDLVN  | NHTSD | HRWF   | QAAL  | KNPAS | PYRD  | 128   |      |     |
| 28-L.ruminis_ATCC_27782 AEN77768        | 45 | IGA    | WLS      | PVYK      | SPND      | DNGYDISDY | RNIMKE  | FGTMS   | DMDEL   | IDE     | ANKR   | GIRI   | MDLV  | NHTSD  | HEHWF | IESR  | SSKDN | LYRD  | 124  |     |
| 29-L.delbrueckii ADQ60220               | 51 | IDA    | WLS      | PVYK      | SPND      | DNGYDISDY | YRIQPE  | YGTMET  | FEEL    | LRQA    | HRLGI  | KI     | MDI   | VNHTSD | HAWFI | EASS  | SKDS  | PLRD  | 131  |     |
| 30-L.casei_LC2W AEA53469                | 44 | IDA    | WLS      | PVYK      | SPND      | DNGYDISDY | YRIQPE  | YGTMET  | FEEL    | LRQA    | HRLGI  | KI     | MDI   | VNHTSD | HAWFI | EASS  | SKDS  | PLRD  | 131  |     |
| 31-C.sp._DL-VIII ZP_09206015            | 45 | IDV    | WLS      | PVYK      | SPND      | DNGYDISDY | EDIMDD  | FGTME   | DMDEL   | IKE     | GKNG   | RIKI   | MDLV  | NHTSD  | HEHWF | IESR  | SSKDN | LYRD  | 124  |     |
| 32-C.sp._DL-VIII ZP_09207308            | 45 | IDV    | WLS      | PVYK      | SPND      | DNGYDISDY | EDIMDD  | FGTME   | DMDEL   | IKE     | GKNG   | RIKI   | MDLV  | NHTSD  | HEHWF | IESR  | SSKDN | LYRD  | 124  |     |
| 33-L.jensenii_269-3 ZP_04645733         | 44 | VDV    | WLC      | PIYK      | SPGAD     | DNGYDISDY | YRIQPE  | YGTMET  | FEEL    | LRQA    | HRLGI  | KI     | MDI   | VNHTSD | HAWFI | EASS  | SKDS  | PLRD  | 131  |     |
| 34-L.iners_DSM_13335 ZP_05744409        | 44 | IDA    | WLS      | PVYK      | SPND      | DNGYDISDY | QAIDPR  | FGTMA   | DFDQL   | MATAKDL | GIKVV  | MDLVN  | NHTSD | HRWF   | QAAL  | KNPAS | PYRD  | 128   |      |     |
| 35-L.johnsonii_DPC_6026 AEB92563        | 44 | IDA    | WLS      | PVYK      | SPND      | DNGYDISDY | QAIDPR  | FGTMA   | DFDQL   | MATAKDL | GIKVV  | MDLVN  | NHTSD | HRWF   | QAAL  | KNPAS | PYRD  | 128   |      |     |
| 36-L.johnsonii_ATCC_33200 ZP_04006730   | 81 | IDA    | WLS      | PVYK      | SPND      | DNGYDISDY | QAIDPR  | FGTMA   | DFDQL   | MATAKDL | GIKVV  | MDLVN  | NHTSD | HRWF   | QAAL  | KNPAS | PYRD  | 128   |      |     |
| 37-L.gasseri_ATCC_33323 ABJ59631        | 44 | IDA    | WLS      | PVYK      | SPND      | DNGYDISDY | QAIDPR  | FGTMA   | DFDQL   | MATAKDL | GIKVV  | MDLVN  | NHTSD | HRWF   | QAAL  | KNPAS | PYRD  | 128   |      |     |
| 38-L.amylolyticus_DSM_11664 ZP_06818684 | 44 | IDA    | WLS      | PVYK      | SPND      | DNGYDISDY | QAIDPR  | FGTMA   | DFDQL   | MATAKDL | GIKVV  | MDLVN  | NHTSD | HRWF   | QAAL  | KNPAS | PYRD  | 128   |      |     |
| 39-L.acidophilus_NCFM G16G LBA0264      | 44 | IDA    | WLS      | PVYK      | SPND      | DNGYDISDY | QAIDPR  | FGTMA   | DFDQL   | MATAKDL | GIKVV  | MDLVN  | NHTSD | HRWF   | QAAL  | KNPAS | PYRD  | 128   |      |     |
| 40-L.amylolyticus_GRL1118 AEA31245      | 44 | IDA    | WLS      | PVYK      | SPND      | DNGYDISDY | QAIDPR  | FGTMA   | DFDQL   | MATAKDL | GIKVV  | MDLVN  | NHTSD | HRWF   | QAAL  | KNPAS | PYRD  | 128   |      |     |
| 41-L.crispatus_ST1 CBL49714             | 44 | IDA    | WLS      | PVYK      | SPND      | DNGYDISDY | QAIDPR  | FGTMA   | DFDQL   | MATAKDL | GIKVV  | MDLVN  | NHTSD | HRWF   | QAAL  | KNPAS | PYRD  | 128   |      |     |
| 42-Lc.garvieae_ATCC_49156 YP_004779435  | 46 | IGG    | WLS      | PVYK      | SPND      | DNGYDISDY | YESIMDE | FGTME   | DMDEL   | ISE     | ADKR   | GIRI   | MDLV  | NHTSD  | HEHWF | IESR  | SSKDN | LYRD  | 125  |     |
| 43-E.saccharolyticus_30-1 ZP_09110526   | 44 | IDA    | WLS      | PVYK      | SPND      | DNGYDISDY | QAIDPR  | FGTMA   | DFDQL   | MATAKDL | GIKVV  | MDLVN  | NHTSD | HRWF   | QAAL  | KNPAS | PYRD  | 128   |      |     |
| 44-E.italicus_DSM_15952 ZP_07895345     | 44 | ITA    | WLS      | PVYK      | SPND      | DNGYDISDY | QAIDPR  | FGTMA   | DFDQL   | MATAKDL | GIKVV  | MDLVN  | NHTSD | HRWF   | QAAL  | KNPAS | PYRD  | 128   |      |     |
| 45-E.faecalis_T2 ZP_05424932            | 45 | IDA    | WLS      | PVYK      | SPND      | DNGYDISDY | EEIMAE  | FGTME   | DMDEL   | IEE     | GKRN   | RIKI   | MDLV  | NHTSD  | HEHWF | IESR  | SSKDN | LYRD  | 124  |     |
| 46-E.faecium_TX0133a04 ZP_07845411      | 60 | IDA    | WLS      | PVYK      | SPND      | DNGYDISDY | QAIDPR  | FGTMA   | DFDQL   | MATAKDL | GIKVV  | MDLVN  | NHTSD | HRWF   | QAAL  | KNPAS | PYRD  | 128   |      |     |
| 47-T.halophilus_NBRC_12172 YP_004886502 | 45 | IGA    | WLS      | PVYK      | SPND      | DNGYDISDY | YRIQPE  | YGTMET  | FEEL    | LRQA    | HRLGI  | KI     | MDI   | VNHTSD | HAWFI | EASS  | SKDS  | PLRD  | 131  |     |
| 48-E.faecalis_TX0109 ZP_07568166        | 45 | IGA    | WLS      | PVYK      | SPND      | DNGYDISDY | YRIQPE  | YGTMET  | FEEL    | LRQA    | HRLGI  | KI     | MDI   | VNHTSD | HAWFI | EASS  | SKDS  | PLRD  | 131  |     |
| 49-E.saburreum_DSM_3986 ZP_07905892     | 45 | IDV    | WLS      | PVYK      | SPND      | DNGYDISDY | YRIQPE  | YGTMET  | FEEL    | LRQA    | HRLGI  | KI     | MDI   | VNHTSD | HAWFI | EASS  | SKDS  | PLRD  | 131  |     |
| 50-R.sp._5_1_39B_FAA ZP_04856921        | 45 | IDV    | WLS      | PVYK      | SPND      | DNGYDISDY | YRIQPE  | YGTMET  | FEEL    | LRQA    | HRLGI  | KI     | MDI   | VNHTSD | HAWFI | EASS  | SKDS  | PLRD  | 131  |     |
| 51-T.thermosaccharolyticum YP_003852493 | 45 | VDV    | WLC      | PIYK      | SPNC      | DNGYDISDY | KDIMDE  | FGTME   | DFERL   | LKEA    | HQRGI  | KI     | MDM   | VNHTSD | QHRWF | QESL  | KGKDN | PYHD  | 122  |     |
| 52-C.owensensis_OL YP_004001509         | 47 | VDV    | WLN      | PVYK      | SPND      | DNGYDISDY | QAIDPR  | FGTMA   | DFDQL   | MATAKDL | GIKVV  | MDLVN  | NHTSD | HRWF   | QAAL  | KNPAS | PYRD  | 128   |      |     |
| 53-O.sp._TW25 ZP_08784662               | 45 | IDV    | WLS      | PVYK      | SPND      | DNGYDISDY | QSIMDE  | FGTME   | DMDEL   | IAE     | IHKR   | GMKLI  | MDLV  | NHTSD  | HEHWF | IESR  | SSKDN | LYRD  | 124  |     |
| 54-B.sp._NRR_LB-14911 ZP_01172682       | 50 | IDV    | WLS      | PVYK      | SPND      | DNGYDISDY | KNIMDE  | FGTME   | DMDEL   | INEL    | HLRDM  | KLI    | MDLV  | NHTSD  | HEHWF | IESR  | SSKDN | LYRD  | 129  |     |
| 55-B.sp._2_A_57_CT2 ZP_08004010         | 45 | IDV    | WLS      | PVYK      | SPND      | DNGYDISDY | QKIMSE  | FGTME   | DFERL   | LKEA    | HQRGI  | KI     | MDM   | VNHTSD | QHRWF | QESL  | KGKDN | PYHD  | 122  |     |
| 56-B.halodurans_C-125 NP_243769         | 45 | VDV    | WLS      | PVYK      | SPND      | DNGYDISDY | RDIMSE  | FGTME   | DFERL   | LKEA    | HQRGI  | KI     | MDM   | VNHTSD | QHRWF | QESL  | KGKDN | PYHD  | 122  |     |
| 57-G.thermoglucoasidasius BAA01368 O16G | 45 | VDV    | WLS      | PVYK      | SPND      | DNGYDISDY | RDIMSE  | FGTME   | DFERL   | LKEA    | HQRGI  | KI     | MDM   | VNHTSD | QHRWF | QESL  | KGKDN | PYHD  | 122  |     |
| 58-B.cereus_Rock3-44 ZP_04218751        | 51 | IDV    | WLS      | PVYK      | SPND      | DNGYDISDY | YRIQPE  | YGTMET  | FEEL    | LRQA    | HRLGI  | KI     | MDI   | VNHTSD | HAWFI | EASS  | SKDS  | PLRD  | 131  |     |
| 59-B.cereus_ATCC_14579 AAP10934 O16G    | 45 | IDV    | WLS      | PVYK      | SPND      | DNGYDISDY | YRIQPE  | YGTMET  | FEEL    | LRQA    | HRLGI  | KI     | MDI   | VNHTSD | HAWFI | EASS  | SKDS  | PLRD  | 131  |     |
| 60-Lis.grayi_DSM_20601 ZP_07053050      | 45 | INTI   | WLN      | PIYK      | SPQV      | DNGYDISDY | YRIQPE  | YGTMET  | FEEL    | LRQA    | HRLGI  | KI     | MDI   | VNHTSD | HAWFI | EASS  | SKDS  | PLRD  | 131  |     |
| 61-B.coagulans_36D1 YP_004859480        | 45 | ATAI   | WLN      | PIYK      | SPQV      | DNGYDISDY | YRIQPE  | YGTMET  | FEEL    | LRQA    | HRLGI  | KI     | MDI   | VNHTSD | HAWFI | EASS  | SKDS  | PLRD  | 131  |     |
| 62-C.sp._AT7 ZP_02185859                | 46 | VTAI   | WLN      | PIYK      | SPQV      | DNGYDISDY | YRIQPE  | YGTMET  | FEEL    | LRQA    | HRLGI  | KI     | MDI   | VNHTSD | HAWFI | EASS  | SKDS  | PLRD  | 131  |     |
| 63-C.sp._17-4 YP_004375075              | 45 | VNMI   | WLN      | PIYK      | SPQV      | DNGYDISDY | YRIQPE  | YGTMET  | FEEL    | LRQA    | HRLGI  | KI     | MDI   | VNHTSD | HAWFI | EASS  | SKDS  | PLRD  | 131  |     |
| 64-C.sp._AT7 ZP_02185858                | 45 | VNMI   | WLN      | PIYK      | SPQV      | DNGYDISDY | YRIQPE  | YGTMET  | FEEL    | LRQA    | HRLGI  | KI     | MDI   | VNHTSD | HAWFI | EASS  | SKDS  | PLRD  | 131  |     |
| 65-L.farciminis_KCTC_3681 ZP_08576747   |    |        |          |           |           |           |         |         |         |         |        |        |       |        |       |       |       |       |      |     |

|                                          |     |     | 130   | 140     | 150      | 160   | 170  | 180      | 190  | 200  |      |        |       |     |      |       |      |      |      |       |      |      |      |     |    |   |   |   |    |     |    |    |    |    |    |    |    |   |    |   |   |   |   |   |   |   |     |   |   |   |   |   |     |   |   |   |     |     |     |     |     |     |     |     |   |     |
|------------------------------------------|-----|-----|-------|---------|----------|-------|------|----------|------|------|------|--------|-------|-----|------|-------|------|------|------|-------|------|------|------|-----|----|---|---|---|----|-----|----|----|----|----|----|----|----|---|----|---|---|---|---|---|---|---|-----|---|---|---|---|---|-----|---|---|---|-----|-----|-----|-----|-----|-----|-----|-----|---|-----|
| 1-L. plantarum  ADN99864                 | 125 | FYI | IRRG  | .AHGNP  | PNNWRSNF | GK    | GSSW | TLLPGSQD | EYH  | HVFS | KQ   | QPDNLN | EN    | PAL | RKRI | YQMIN | WVLA | KGV  | AGFR | IDA   | 203  |      |      |     |    |   |   |   |    |     |    |    |    |    |    |    |    |   |    |   |   |   |   |   |   |   |     |   |   |   |   |   |     |   |   |   |     |     |     |     |     |     |     |     |   |     |
| 2-L. casei_ATCC_334  ABJ70852            | 129 | FYI | IRRG  | .HDGQP  | PNNWRSNF | GK    | GSSW | TAVPGE   | PNT  | YH   | HVFS | QPDNLN | EN    | PKL | RQAI | YSMIN | WVLA | KGV  | AGFR | IDA   | 207  |      |      |     |    |   |   |   |    |     |    |    |    |    |    |    |    |   |    |   |   |   |   |   |   |   |     |   |   |   |   |   |     |   |   |   |     |     |     |     |     |     |     |     |   |     |
| 3-L. rhamnosus_ATCC_8530  AER64849       | 129 | YYI | FRKG  | .HDGQP  | PNNWRSNF | GK    | GSAW | TAVPGE   | ADM  | YH   | HVFS | QPDNLN | EN    | PKL | RQAI | YSMIN | WVLA | KGV  | AGFR | IDA   | 207  |      |      |     |    |   |   |   |    |     |    |    |    |    |    |    |    |   |    |   |   |   |   |   |   |   |     |   |   |   |   |   |     |   |   |   |     |     |     |     |     |     |     |     |   |     |
| 4-E. italicus_DSM_15952  ZP_07895342     | 129 | YYI | WADG  | ...TQK  | PNE      | WESTF | .GSI | WQEVPSL  | .KKQ | YLV  | FAKE | QPDNLN | EN    | KQ  | MRQD | LYKMR | WVLD | L    | GIDG | FRIDA | 203  |      |      |     |    |   |   |   |    |     |    |    |    |    |    |    |    |   |    |   |   |   |   |   |   |   |     |   |   |   |   |   |     |   |   |   |     |     |     |     |     |     |     |     |   |     |
| 5-L. sakei_subsp._sakei_23K  YP_395811   | 123 | YYL | WRDP  | .VDGHE  | PNNWRSNF | GK    | GSAW | EYVPAL   | .N   | QY   | LHL  | YKRM   | PDLN  | WR  | N    | Q     | REEI | YQMM | Q    | WADL  | GIDG | LRDL | 199  |     |    |   |   |   |    |     |    |    |    |    |    |    |    |   |    |   |   |   |   |   |   |   |     |   |   |   |   |   |     |   |   |   |     |     |     |     |     |     |     |     |   |     |
| 6-P. larvae  ZP_02329600                 | 125 | YYI | WKNP  | .ADGGV  | PNNWRSNF | GK    | GSAW | AFDERT   | .G   | QY   | LHL  | FDES   | QADLN | W   | EN   | PEL   | RERI | YDMM | R    | WLDK  | GV   | DGFR | LDVI | 201 |    |   |   |   |    |     |    |    |    |    |    |    |    |   |    |   |   |   |   |   |   |   |     |   |   |   |   |   |     |   |   |   |     |     |     |     |     |     |     |     |   |     |
| 7-T. halophilus_NBRC_12172  YP_004886688 | 127 | YYI | WHPG  | KKDGSR  | PNNWESTF | .NG   | PAW  | EWD      | DKT  | .K   | EY   | MH     | F     | S   | K    | Q     | P    | D    | L    | N     | W    | EN   | PEV  | R   | Q  | S | L | Y | D  | T   | V  | N  | W  | L  | D  | K  | G  | I | D  | G | F | R | I | D | A | I | 204 |   |   |   |   |   |     |   |   |   |     |     |     |     |     |     |     |     |   |     |
| 8-B. fuscum  BAB60692                    | 139 | YYI | WRDP  | .HHGAE  | PNNWGSFF | .SG   | SAW  | E        | W    | D    | E    | Q      | T     | .G  | QY   | L     | H    | L    | F    | S     | K    | K    | Q    | P   | D  | L | N | W | EN | PEV | R  | A  | A  | I  | Y  | R  | M  | N | W  | L | D | R | G | I | D | G | F   | R | M | D | V | I | 215 |   |   |   |     |     |     |     |     |     |     |     |   |     |
| 9-H. hydrogeniformans  YP_003995944      | 125 | YYI | WKDG  | .KNDGP  | PNNWGSFF | .GG   | S    | T        | W    | E    | Y    | D      | Q     | K   | T    | .D    | QY   | L    | H    | L     | F    | S    | K    | K   | Q  | P | D | L | N  | W   | EN | K  | E  | L  | R  | S  | E  | L | Y  | D | M | N | W | L | E | K | G   | I | D | G | F | R | L   | D | V | I | 201 |     |     |     |     |     |     |     |   |     |
| 10-L. pentosus_IG1  CCC17113             | 125 | YYI | WADP  | .VDGHV  | PNDLTS   | SGF   | IG   | S        | A    | W    | Q    | W      | A     | E   | S    | .E    | QY   | L    | H    | L     | F    | S    | E    | K   | Q  | I | D | L | N  | W   | Q  | N  | P  | K  | L  | R  | Q  | A | I  | Y | Q | M | N | F | W | I | D   | Q | G | I | S | G | F   | R | M | D | V   | I   | 202 |     |     |     |     |     |   |     |
| 11-L. plantarum  AD000180                | 125 | YYI | WADA  | .VDGHA  | PNDLTS   | SGF   | SG   | S        | A    | W    | E    | L      | D     | E   | L    | T     | .G   | QY   | L    | H     | L    | F    | S    | K   | K  | Q | I | D | L  | N   | W  | Q  | N  | P  | D  | L  | R  | R | A  | I | Y | R | M | N | F | W | I   | D | K | G | I | E | G   | F | R | M | D   | V   | I   | 202 |     |     |     |     |   |     |
| 12-L. pentosus_IG1  CCC16900             | 127 | FYI | FRSG  | .KGA    | DQ       | PNNW  | S    | A        | F    | .G   | S    | A      | W     | T   | Y    | D     | E    | Q    | T    | .Q    | QY   | L    | H    | T   | F  | S | T | K | Q  | P   | D  | L  | N  | W  | EN | P  | A  | L | R  | T | A | I | Y | Q | M | T | W   | L | E | K | G | V | D   | G | F | R | M   | D   | V   | I   | 203 |     |     |     |   |     |
| 13-L. plantarum  ADN97379                | 127 | FYI | FRSG  | .NGKKA  | PNNW     | D     | A    | F        | .G   | S    | A    | W      | Q     | Y   | D    | E     | Q    | T    | .Q   | QY    | L    | H    | T    | F   | S  | T | K | Q | P  | D   | L  | N  | W  | EN | P  | T  | L  | R | E  | S | V | T | M | M | T | W | L   | N | K | G | V | D | G   | F | R | M | D   | V   | I   | 203 |     |     |     |     |   |     |
| 14-L. rhamnosus_ATCC_8530  AER65504      | 125 | YYI | WRDP  | .VDGHA  | PNNWR    | A     | D    | F        | .G   | S    | A    | W      | T     | Y   | V    | E     | V    | .G   | QY   | L     | H    | L    | F    | A   | V  | K | Q | P | D  | L   | N  | W  | EN | P  | A  | V  | R  | K | A  | V | T | M | M | Q | W | C | D   | Q | G | I | D | G | F   | R | M | D | V   | I   | 201 |     |     |     |     |     |   |     |
| 15-L. brevis_ATCC_367  ABJ65230          | 125 | YYI | WRDP  | .VDGHE  | PNNWGSFF | .GG   | S    | A        | W    | T    | F    | E      | P     | K   | R    | .G    | QY   | L    | H    | L     | F    | A    | P    | G   | Q  | P | D | L | N  | W   | EN | P  | Q  | V  | R  | E  | A  | V | W  | N | L | M | R | F | W | L | D   | K | G | V | D | G | F   | R | M | D | V   | I   | 201 |     |     |     |     |     |   |     |
| 16-L. pentosus_IG1  CCC16895             | 125 | YYI | WRDP  | .VDGHA  | PNNWGSFF | .GG   | S    | V        | W    | E    | Y    | V      | E     | S   | R    | .Q    | QY   | L    | H    | S     | F    | A    | V    | E   | Q  | P | D | L | N  | W   | EN | P  | K  | L  | R  | Q  | A  | V | Y  | D | M | N | F | W | V | D | K   | G | V | D | G | F | R   | L | D | V | I   | 201 |     |     |     |     |     |     |   |     |
| 17-L. plantarum  ADN97381                | 125 | YYI | WRDP  | .VDGHE  | PNNWGSFF | .GG   | S    | A        | W    | K    | Y    | V      | A     | S   | R    | .D    | QY   | L    | H    | S     | F    | A    | V    | E   | Q  | P | D | L | N  | W   | EN | P  | Q  | L  | R  | Q  | A  | V | Y  | D | M | N | F | W | N | K | G   | V | D | G | F | R | L   | D | V | I | 201 |     |     |     |     |     |     |     |   |     |
| 18-R. lactaris_ATCC_29176  ZP_03168755   | 133 | YYI | WKDE  | ....VIN | NWGS     | S     | F    | .G       | S    | A    | W    | E      | Y     | A   | E    | R     | .A   | QY   | L    | H     | C    | F    | A    | K   | E  | Q | P | D | L  | N   | W  | EN | P  | K  | V  | R  | Q  | E | V  | Y | D | I | L | R | F | W | L   | D | K | G | I | D | G   | F | R | M | D   | V   | I   | 205 |     |     |     |     |   |     |
| 19-D._formicigenerans  ZP_02235523       | 132 | YYI | WRDP  | ....V   | PNNW     | G     | S    | S        | F    | .G   | S    | A      | W     | E   | Y    | V     | E    | A    | V    | .D    | QY   | L    | H    | L   | F  | S | K | K | Q  | P   | D  | L  | N  | W  | EN | P  | K  | V | R  | E | D | Y | D | I | L | R | F   | W | L | D | K | G | I   | D | G | F | R   | M   | D   | V   | I   | 204 |     |     |   |     |
| 20-R. torques_ATCC_27756  ZP_01967024    | 130 | YYI | WKDT  | ....I   | PNNW     | G     | S    | S        | F    | .G   | P    | A      | W     | E   | Y    | V     | E    | E    | T    | .A    | QY   | L    | H    | L   | F  | A | K | E | Q  | P   | D  | L  | N  | W  | EN | P  | K  | V | R  | K | E | V | Q | E | I | L | R   | F | W | L | E | K | G   | I | D | G | F   | R   | M   | D   | V   | I   | 202 |     |   |     |
| 21-B. coagulans  BAA11354  O16G          | 124 | FYI | WKDP  | KPKD    | GTP      | PNNW  | G    | S        | M    | F    | .G   | S      | A     | W   | E    | Y     | D    | E    | T    | .G    | QY   | L    | H    | Y   | F  | S | K | K | Q  | P   | D  | L  | N  | W  | EN | E  | K  | V | R  | K | E | I | Y | D | M | M | K   | F | W | M | D | K | G   | V | D | G | F   | R   | M   | D   | V   | I   | 201 |     |   |     |
| 22-F. prausnitzii_L2-6  CBK98455         | 125 | YYI | WKPG  | .KDGHE  | PNNW     | G     | A    | S        | F    | .G   | S    | A      | W     | K   | Y    | D     | P    | Q    | T    | .D    | Y    | L    | H    | L   | F  | S | P | K | Q  | P   | D  | L  | N  | W  | EN | P  | K  | V | R  | D | E | V | F | N | M | T | W   | F | D | K | G | I | D   | G | F | R | M   | D   | V   | I   | 201 |     |     |     |   |     |
| 23-L. sakei_subsp._sakei_23K  CAI56099   | 125 | FYI | WRDP  | ATD     | G        | S     | V    | P        | N    | L    | S    | N      | F     | .G  | S    | A     | W    | A    | F    | D     | A    | V    | T    | .N  | QY | L | H | L | F  | S   | P  | K  | Q  | P  | D  | L  | N  | W | EN | P | K | V | R | E | A | V | Y   | K | M | M | F | W | L   | D | K | G | I   | D   | G   | F   | R   | M   | D   | V   | I | 202 |
| 24-C. leptum_DSM_753  ZP_02079428        | 149 | YYI | WKKG  | .KDSKP  | PNNW     | G     | S    | W        | F    | .Y   | G    | S      | A     | W   | E    | Y     | D    | Q    | Q    | T     | .D   | S    | H    | L   | H  | F | S | K | K  | Q   | P  | D  | L  | N  | W  | EN | P  | K | V  | R | R | E | I | Y | D | M | T   | W | L | E | K | G | V   | D | G | F | R   | M   | D   | V   | I   | 225 |     |     |   |     |
| 25-S. mutans  AA26939  G16G              | 125 | YYI | WCDQ  | ....P   | N        | L     | S    | I        | F    | .G   | S    | A      | W     | Q   | Y    | D     | D    | K    | S    | .D    | QY   | L    | H    | F   | F  | S | K | K | Q  | P   | D  | L  | N  | W  | EN | A  | N  | L | R  | Q | K | I | Y | D | M | N | F   | W | I | D | K | G | I   | G | F | R | M   | D   | V   | I   | 196 |     |     |     |   |     |
| 26-S. mitis_bv._2_str._F0392  EGR94186   | 126 | YYI | WRDE  | ....P   | N        | L     | S    | I        | F    | .G   | S    | A      | W     | Y   | D    | E     | K    | S    | .G   | QY    | L    | H    | F    | F   | S  | K | K | Q | P  | D   | L  | N  | W  | EN | E  | K  | L  | R | Q  | K | I | Y | E | M | N | F | W   | I | D | K | G | I | G   | F | R | M | D   | V   | I   | 197 |     |     |     |     |   |     |
| 27-L. pseudomesenteroides  ZP_08659173   | 125 | FYI | WRDA  | .NHNA   | PNNL     | H     | S    | A        | F    | .G   | S    | A      | W     | T   | L    | D     | P    | L    | T    | .N    | QY   | L    | H    | L   | F  | S | P | K | Q  | P   | D  | L  | N  | W  | EN | P  | D  | V | R  | E | A | I | Y | A | M | N | F   | W | L | D | K | G | I   | D | G | F | R   | M   | D   | V   | I   | 201 |     |     |   |     |
| 28-L. ruminis_ATCC_27782  AEN77768       | 125 | YYI | WRDP  | .IDGSE  | PNNL     | S     | L    | K        | S    | C    | F    | .G     | S     | A   | W    | Q     | Y    | D    | E    | Q     | S    | .G   | QY   | L   | H  | F | S | P | K  | Q   | P  | D  | L  | N  | W  | EN | P  | E | V  | R | E | E | V | D | M | N | F   | W | I | D | K | G | I   | G | F | R | M   | D   | V   | I   | 201 |     |     |     |   |     |
| 29-L. delbrueckii  ADQ60220              | 131 | YYI | WADK  | ....A   | N        | E     | L    | K        | S    | A    | F    | .G     | S     | A   | W    | E     | Y    | D    | G    | Q     | V    | .G   | QY   | L   | H  | L | F | A | K  | E   | Q  | P  | D  | L  | N  | W  | EN | P | A  | L | R | Q | K | V | Y | D | L   | M | N | F | W | I | D   | K | G | I | G   | F   | R   | M   | D   | V   | I   | 202 |   |     |
| 30-L. casei_LC2W  AEA53469               | 124 | YYI | WRDGS | AIGGP   | PNNM     | K     | S    | T        | F    | .G   | S    | A      | W     | Q   | R    | D     | E    | A    | T    | .G    | QY   | L    | H    | L   | F  | G | D | K | Q  | P   | D  | L  | N  | W  | EN | A  | N  | P | Q  | V | R | Q | A | I | Y | K | M   | N | F | W | I | S | K   | G | I | G | F   | R   | M   | D   | V   | I   | 201 |     |   |     |
| 31-C. sp._DL-VIII  ZP_09206015           | 125 | FYI | WRDP  | .VKGEE  | PNNL     | H     | S    | A        | F    | .G   | S    | A      | W     | K   | Y    | D     | E    | V    | S    | .D    | QY   | L    | H    | L   | F  | S | P | K | Q  | P   | D  | L  | N  | W  | EN | A  | E  | M | R  | N | K | I | Y | D | M | N | F   | W | L | D | K | G | I   | D | G | F | R   | M   | D   | V   | I   | 201 |     |     |   |     |
| 32-C. sp._DL-VIII  ZP_09207308           | 125 | YYI | WRDS  | .VNGEE  | PNNL     | R     | S    | T        | F    | .G   | S    | A      | W     | Q   | Y    | D     | E    | I    | T    | .G    | QY   | L    | H    | L   | F  | S | K | K | Q  | P   | D  | L  | N  | W  | EN | E  | E  | M | R  | N | K | V | Y | D | M | N | F   | W | I | D | K | G | I   | G | F | R | M   | D   | V   | I   | 201 |     |     |     |   |     |
| 33-L. jensenii_269-3  ZP_04645733        |     |     |       |         |          |       |      |          |      |      |      |        |       |     |      |       |      |      |      |       |      |      |      |     |    |   |   |   |    |     |    |    |    |    |    |    |    |   |    |   |   |   |   |   |   |   |     |   |   |   |   |   |     |   |   |   |     |     |     |     |     |     |     |     |   |     |

Region II       $\beta_4 \rightarrow \alpha_4$  loop      Region III

| Accession                               | 204                             | 210                                      | 220                       | 230                 | 240                | 250                | 260    | 279  |
|-----------------------------------------|---------------------------------|------------------------------------------|---------------------------|---------------------|--------------------|--------------------|--------|------|
| 1-L.plantarum ADN99864                  | TFIKKQDFASISP                   | DGVDGLGKVKRKAENRPGLEKFLAELNTATFKPA       | ..                        | NAVTVGEASGVSYDQLGQ  | IGKKG              | Y                  | FSM    | 279  |
| 2-L.casei_ATCC_334 ABJ70852             | TFIKKQDFASITP                   | DGSDGLGKVKRKTENRPGLDQFLKELNVATFKPA       | ..                        | NAVTVGEASGVVAYDQLGQ | IGKKG              | Y                  | FMS    | 283  |
| 3-L.rhamnosus_ATCC_8530 AER64849        | TFIKKQDFAAITP                   | DGNDGLGKVKRKAENRPGLARFLKELNAATFKPA       | ..                        | NAVTVGEASGVVAYDELGD | IGKNG              | Y                  | FMS    | 283  |
| 4-E.italicus_DSM_15952 ZP_07895342      | SHIKKSSW                        | DTKPDADWAFSPFTNVAGIDVYLETGQ              | IFKEY                     | ..                  | DIVTVGEASGVTAEQAPE | VGENG              | Y      | FNM  |
| 5-L.sakei_subsp._sakei_23K YP_395811    | NMISKDKDFPNDTF                  | ETPSDDGRNFYTNCPHYHEYLHEMYERVFSGPN        | ..                        | NFVTVGELSSTPVSEAIRY | INPERE             | ELSM               | 274    | 274  |
| 6-P.larvae ZP_02329600                  | NLISKDQRYPNDDL                  | EKATDDGRKYTDGPRHEYLKEMNERVFSRY           | PNL                       | ..                  | LTVGEMSSTSIHCIRY   | INPEEK             | ELSM   | 277  |
| 7-T.halophilus_NBRC_12172 YP_004886688  | THIKKKGFPDLPN                   | PLKKDVVPSFDAHMNQPDKHLTELAEEFTNNY         | ..                        | DIVTVGEANGVEVEDAEQ  | VGEENG             | Y                  | FDM    | 281  |
| 8-B.fusum BAB60692                      | SFISKHPDLPDGA                   | GKGGIWDGIPFFGSGPRVHEYLQEMHREVFHRDA       | DL                        | ..                  | TVGEMVDVTEPELARLY  | DQRRK              | ELDM   | 294  |
| 9-H.hydrogeniformans YP_003995944       | NLISKNDQDFPDGKE                 | NGLCGHEHFA                               | NGPRVHEFLQEMA             | AEKTYNNY            | ..                 | DAMTVGEPFVVDKDEAIK | VKEERQ | EFSM |
| 10-L.pentosus_IG1 CCC17113              | DMIAKEPL                        | NKVLVNGPRVHEYLHEMNRQTWADR                | ..                        | DFTVGEAWSASPEDARQ   | YSDEQR             | ELSM               | 264    | 264  |
| 11-L.plantarum AD000180                 | DMIAKEPR                        | AKILVNGPHHEYLHEMNRQTWRNR                 | ..                        | DFTVGEAWSASPEDARQ   | YSDEQR             | ELSM               | 264    | 264  |
| 12-L.pentosus_IG1 CCC16900              | NQISKLPGLPDGPL                  | KPHSQYGDARVTNGPHHEFLQEMNRRVLSRF          | ..                        | DIMTVGETHGVTTPADAR  | KYAGNDR            | ELDM               | 278    | 278  |
| 13-L.plantarum ADN97379                 | NQISKLPGLPDGPL                  | KPHSQYGDARVTNGPRVHEFLQEMNQEVLVSQF        | ..                        | DIMTVGETHGVTTPADAL  | KYAGADR            | ELDM               | 278    | 278  |
| 14-L.rhamnosus_ATCC_8530 AER65504       | NLISKPEVFADDPH                  | LLEQPNGLSLGLIANGPHVHEYLKEMNRKAVLSKH      | ..                        | DIMTVGEAPGVTTPALAL  | QYGFDR             | HELM               | 278    | 278  |
| 15-L.brevis_ATCC_367 ABJ65230           | NLISKPAFLPDAPQ                  | APGAAYGDSQPIVSDGPKNDYLRMNEDEVLSHY        | ..                        | DVMTVGEMPGSTPKDAIT  | YGLNAN             | ELNM               | 278    | 278  |
| 16-L.pentosus_IG1 CCC16895              | NLISKPASFADGQP                  | EAGEPYAAIGDIVANGPHLHDYLRMNEDEVLSHY       | ..                        | QLMTVGETPGATVADAK   | QLASLQ             | QELNM              | 278    | 278  |
| 17-L.plantarum ADN97381                 | NLISKPDSFADGQP                  | EAGEPYAAIGGIIANGPHLHEYLQEMNQVVFAGH       | ..                        | QLMTVGETPGATVADAK   | QLASGQ             | QELNM              | 278    | 278  |
| 18-R.lactaris_ATCC_29176 ZP_03168755    | SLISKDQSFDPDPV                  | IQNKAYGSYYAGCANGPRVHEFLQEMNREVLSKY       | ..                        | DIMTVGEAPHTNADEAAL  | YTESR              | KELNM              | 282    | 282  |
| 19-D._formicigenerans ZP_02235523       | TLISKDPTFPDGP                   | IQNKAYGSYYAGCANGPRVHEYLQEMNREVLSKY       | ..                        | DIMTVGEAPHTNADEAAL  | YTESR              | KELNM              | 281    | 281  |
| 20-R.torques_ATCC_27756 ZP_01967024     | TLISKDPAYPDGPV                  | IQNKAYGSYYAGCANGPRVHEYLQEMNREVLSKY       | ..                        | DIMTVGEAPHTNADEAAL  | YTESR              | KELNM              | 279    | 279  |
| 21-B.coagulans BAA11354 O16G            | GSISKFLDFPDYEL                  | PEGQKYGI                                 | GKYHANGPRVHEFLQEMNREVLSKY | ..                  | DCMTVGEAIGSDVEIAR  | KYTPDR             | HELM   | 277  |
| 22-F.prausnitzii_L2-6 CBK98455          | SMISKDQRFDPDGEK                 | HGLYGNNGPYVNGPRVHEFLQEMNRRVLSKY          | ..                        | DIMTVGETPGATVENA    | APVAGL             | DGKELNM            | 276    | 276  |
| 23-L.sakei_subsp._sakei_23K CAI56099    | DLIGKEPD                        | RKIKENGPVHEYLQEMNARVLSQY                 | ..                        | DVMTVGETWGATPEI     | QMYNPNR            | HELSM              | 264    | 264  |
| 24-C.leptum_DSM_753 ZP_02079428         | SLISKNRFPDQVGTGAYGEYDLPYCE      | NGPRVHEYLQEMNREVLSRY                     | ..                        | DIMTVGETPNAIVEEA    | ARYTNAAG           | TELM               | 303    | 303  |
| 25-S.mutans AA26939 G16G                | DMIGKIPA                        | QHIVSNGPKLHAYLKEMNAASFGGH                | ..                        | DLLTVGETWGATPEI     | AKYSNPVN           | HELSM              | 258    | 258  |
| 26-S.mitis_bv._2_str._F0392 EGR94186    | DMIGKIPD                        | EKVVNNGPMHPYLKEMNQATFGDK                 | ..                        | DLLTVGETWGATPEI     | AKYSDPKG           | QELSM              | 259    | 259  |
| 27-L.pseudomesenteroides ZP_08659173    | DLIGKIPD                        | DKITANGPKLHAYLKEMNQATFGANH               | ..                        | DLMTVGETWGATPEI     | AKYTRPDR           | HELSM              | 263    | 263  |
| 28-L.ruminis_ATCC_27782 AEN77768        | EMIGKQPD                        | KMISSNGPKLHEYLKEMNQKTFGNH                | ..                        | DLLTVGETWGATPEI     | AKYSDPERN          | ELSM               | 263    | 263  |
| 29-L.delbrueckii ADQ60220               | ELIGKQPE                        | EDITANGPKLHAYLKEMHRETFGGR                | ..                        | DFTVGETWGATLDNAP    | YSDPDR             | KELSM              | 264    | 264  |
| 30-L.casei_LC2W AEA53469                | DLIGKEPD                        | RGIRENGPKLHPYLQEMNRATFGDT                | ..                        | DLLTVGETWGATPEI     | AQYADPKR           | HELSM              | 263    | 263  |
| 31-C.sp._DL-VIII ZP_09206015            | ELIGKIPD                        | KKIKENGPVHEYLKEMNKTFGDK                  | ..                        | NLLTVGEAWCSNPEI     | AKYSDPDG           | SELSM              | 263    | 263  |
| 32-C.sp._DL-VIII ZP_09207308            | ELIGKIPD                        | EKIKENGPVHEYLKEMNKTFGDK                  | ..                        | NLLTVGEAWCSNPEI     | AKYSDPDG           | SELSM              | 263    | 263  |
| 33-L.jensenii_269-3 ZP_04645733         | ECIGKEPD                        | QEITANGPKLHEYLQEMNRETFGKK                | ..                        | DFTVGETWTSASLADAK   | KYIDPKR            | HELSM              | 257    | 257  |
| 34-L.iners_DSM_13335 ZP_05744409        | ELIGKDPD                        | KMIRENGKMLHPYLQEMNQKTFGQS                | ..                        | DLLTVGETWNAATPKI    | AEDYSD             | PARHELSM           | 262    | 262  |
| 35-L.johnsonii_DPC_6026 AEB92563        | ELIGKDPD                        | KKIRENGPMLHPYLKEMNENTFAGK                | ..                        | ELMTVGETWNSNTPKI    | AEYSD              | PARHELSM           | 262    | 262  |
| 36-L.johnsonii_ATCC_33200 ZP_04006730   | ELIGKDPD                        | KKIRENGPMLHPYLKEMNENTFAGK                | ..                        | ELMTVGETWNSNTPKI    | AEYSD              | PARHELSM           | 299    | 299  |
| 37-L.gasseri_ATCC_33323 ABJ59631        | ELIGKDPD                        | QKIRENGPMLHPYLKEMNEHTFANK                | ..                        | DMMTVGETWNAATPKI    | AEYSD              | PARHELSM           | 262    | 262  |
| 38-L.amylovorus_DSM_11664 ZP_06818684   | ELIGKEPD                        | KKIRENGPMLHPYLQEMNKTFGDK                 | ..                        | NLLTVGETWNAATPKI    | AEYSD              | PARHELSM           | 262    | 262  |
| 39-L.acidophilus_NCFM G16G LBA0264      | ELIGKDPD                        | KNIRENGPMLHPYLQEMNKATFGKR                | ..                        | DVMTVGETWNAATPKI    | AEYSD              | PARHELSM           | 262    | 262  |
| 40-L.amylovorus_GRL1118 AEA31245        | ELIGKDPD                        | KMIRENGPMLHPYLQEMNKATFGKR                | ..                        | DVMTVGETWNAATPKI    | AEYSD              | PARHELSM           | 262    | 262  |
| 41-L.crispatus_ST1 CBL49714             | ELIGKDPD                        | KMIRENGPMLHPYLQEMNKATFGDH                | ..                        | DVMTVGETWNAATPKI    | AEYSD              | PARHELSM           | 262    | 262  |
| 42-Lc.garvieae_ATCC_49156 YP_004779435  | DLIGKQPN                        | QGITNGPKLHAYLKEMNQATFGNK                 | ..                        | NLLTVGETWGATPEI     | AKYSDPKN           | KELSM              | 265    | 265  |
| 43-E.saccharolyticus_30_1 ZP_09110526   | DLVIGKQPF                       | KKITNGPKLHEYLQEMNRATFGNK                 | ..                        | DLMTVGETWGATPEI     | AKYSDPKN           | HELSM              | 263    | 263  |
| 44-E.italicus_DSM_15952 ZP_07895345     | DLVIGKQPF                       | KKITNGPKLHEYLQEMNRATFGNK                 | ..                        | DLMTVGETWGATPEI     | AKYSDPKN           | HELSM              | 262    | 262  |
| 45-E.faecalis_T2 ZP_05424932            | DLVIGKQPF                       | KKITNGPKLHEYLQEMNRATFGNK                 | ..                        | DLMTVGETWGATPEI     | AKYSDPKN           | HELSM              | 263    | 263  |
| 46-E.faecium_TX0133a04 ZP_07845411      | DMIGKEPD                        | KEITANGPKLHEYLQEMNQATFGDK                | ..                        | NLLTVGETWGATPEI     | AKYSDPKN           | HELSM              | 278    | 278  |
| 47-T.halophilus_NBRC_12172 YP_004886502 | DLVIGKQPF                       | KKITNGPKLHEYLQEMNRATFGNK                 | ..                        | DLMTVGETWGATPEI     | AKYSDPKN           | HELSM              | 264    | 264  |
| 48-E.faecalis_TX0109 ZP_07568166        | DLVIGKQPF                       | KKITNGPKLHEYLQEMNRATFGNK                 | ..                        | DLMTVGETWGATPEI     | AKYSDPKN           | HELSM              | 264    | 264  |
| 49-E.saburreum_DSM_3986 ZP_07905892     | SLISKPEGFPDAKV                  | VG.LYGD.MNICANGPKVHDYLRMNEKQVLSKF        | ..                        | DIMTVGETAGVTLDEAK   | RYANSEGS           | ELNM               | 275    | 275  |
| 50-R.sp._5_1_39B_FAA ZP_04856921        | SLISKPEGFPDAKV                  | VG.LYGD.MNICANGPKVHDYLRMNEKQVLSKF        | ..                        | DIMTVGETAGVTLDEAK   | RYANSEGS           | ELNM               | 277    | 277  |
| 51-T.thermosaccharolyticum YP_003852493 | NMISKDQRFDPDQIV                 | PEGGLYDMSPYVMNGPRVHEYLKELNEKVLVSKY       | ..                        | DIMTVGETPCVTPPEI    | AIDYVGED           | RNLM               | 278    | 278  |
| 52-C.owensensis_OL YP_004001509         | NLISKVGLPDDRE                   | GEKKGVLGVMFYANGPRVHEYLKEMNREVLSKY        | ..                        | DIMTVGETPFVTPPEI    | AKYTRPDR           | HELSM              | 280    | 280  |
| 53-O._sp._TW25 ZP_08784662              | NLISKDPELDPDAPN                 | PEGRPYVGGQYVNGPRVHEYLQEMNQEVLVSQY        | ..                        | DILTVMGEMPGASVEDAK  | LYDPER             | HEVNM              | 278    | 278  |
| 54-B.sp._NRR_LB-14911 ZP_01172682       | NFISKEDGLPDDEV                  | KPGKKYASGSKYYRNGPRVHEYLQEMNEKVLVSHY      | ..                        | DVMTVGEMPGVKPEMARD  | YTGEDR             | HELSM              | 283    | 283  |
| 55-B.sp._2_A_57_CT2 ZP_08004010         | NFISKVEGLPDDEP                  | KPGKKYASGSKYYRNGPRVHEYLQEMNEKALAKF       | ..                        | NVMTVGEMPGVTPPEI    | ARQYTG             | ESRHELSM           | 278    | 278  |
| 56-B.halodurans_C-125 NP_243769         | NFISKVEGLPDDEP                  | KPGKKYASGSKYYRNGPRVHEYLQEMNEKALAKF       | ..                        | NVMTVGEMPGVTPPEI    | ARQYTG             | ESRHELSM           | 278    | 278  |
| 57-G.thermoglucoasidiasus BAA01368 O16G | NMISKVPELDPDGE                  | QSGKKYASGSRYYMNGPRVHEFLQEMNREVLSKY       | ..                        | DIMTVGETPGVTPKEG    | ILYDPSR            | HELSM              | 278    | 278  |
| 58-B.cereus_Rock3-44 ZP_04218751        | NFISKTEGLPSVET                  | KEEGYVSGHQYFMNGPNHLYHEMNRKQVLSKY         | ..                        | DIMTVGEMPGVTTTEEAR  | LYTADR             | QELQM              | 283    | 283  |
| 59-B.cereus_ATCC_14579 AAP10934 O16G    | NFISKTEGLPSVET                  | KEEGYVSGHQYFMNGPNHLYHEMNRKQVLSKY         | ..                        | DIMTVGEMPGVTTTEEAR  | LYTADR             | QELQM              | 277    | 277  |
| 60-Lis.grayi_DSM_20601 ZP_07053050      | IHLAKADF                        | SKQMSGEETYPYIAEPPYANLPAVKVYLSHEWIGRLKAFH | PEL                       | ..                  | FFLGEAASADATLAEE   | YCDPEADLCDA        | 277    | 277  |
| 61-B.coagulans_36D1 YP_004859480        | IHLAKDTRFLPVKT                  | KSEAFVLAEMFYANLPRVHDYTRFNRRTIKAKH        | PEL                       | ..                  | FLFGEAASADATLAEE   | YCDPEADLCDA        | 279    | 279  |
| 62-C.sp._AT7 ZP_02185859                | IHLAKDTRFLPVKT                  | KSEAFVLAEMFYANLPRVHDYTRFNRRTIKAKH        | PEL                       | ..                  | FLFGEAASADATLAEE   | YCDPEADLCDA        | 281    | 281  |
| 63-C.sp._17-4 YP_004375075              | IHLAKDTRFLPVKT                  | KSEAFVLAEMFYANLPRVHDYTRFNRRTIKAKH        | PEL                       | ..                  | FLFGEAASADATLAEE   | YCDPEADLCDA        | 280    | 280  |
| 64-C.sp._AT7 ZP_02185858                | IHLAKDTRFLPVKT                  | KSEAFVLAEMFYANLPRVHDYTRFNRRTIKAKH        | PEL                       | ..                  | FLFGEAASADATLAEE   | YCDPEADLCDA        | 283    | 283  |
| 65-L.farciminis_KCTC_3681 ZP_08576747   | IHLAKANFEQDSDL                  | SSTKFPIDDKFYAKLPAVKDYSGFVKEIKAFK         | PD                        | ..                  | VFLFGEAASAKARDAE   | YTRPDEHVC          | 277    | 277  |
| 66-L.pentosus_MP-10 CCB83116            | IHLAKADFRQMYPSQSGDSTPIISDMFYAHL | PKVHQYLHDFVAAIKANH                       | PE                        | ..                  | TYVGEAASADPHLMVDY  | TPGTDECDQ          | 282    | 282  |
| 67-L.plantarum YP_003061749             | IHLAKADFRQMYPSQSGDSTPIISDMFYAHL | PKVHQYLHDFVAAIKAKH                       | PD                        | ..                  | TYVGEAASADPHLMVDY  | TPGTDECDQ          | 282    | 282  |
| 68-L.ruminis_SPM0211 ZP_08562977        | IHLAKADFEQNMPS                  | HGKKGPIVAEPPFFANMPLQTYLHDFVVKTLREYK      | PD                        | ..                  | FLFGEAASADIDLAVDY  | TTPKESCDT          | 279    | 279  |
| 69-L.animalis_KCTC_3501 ZP_08548669     | IHLAKADFEQNMPS                  | HGKKGPIVAEPPFFANMPLQTYLHDFVVKTLREYK      | PD                        | ..                  | FLFGEAASADIDLAVDY  | TTPKESCDT          | 278    | 278  |
| 70-L.pentosus_IG1 CCC16918              | IHLAKADFEQNMPS                  | HGKKGPIVAEPPFFANMPLQTYLHDFVVKTLREYK      | PD                        | ..                  | FLFGEAASADIDLAVDY  | TTPKESCDT          | 278    | 278  |
| 71-L.casei_ATCC_334 YP_0806220          | IHLAKADFEQNMPS                  | HGKKGPIVAEPPFFANMPLQTYLHDFVVKTLREYK      | PD                        | ..                  | FLFGEAASADIDLAVDY  | TTPKESCDT          | 279    | 279  |
| 72-L.delbrueckii ZP_07091943            | IHLAKADFEQNMPS                  | HGKKGPIVAEPPFFANMPLQTYLHDFVVKTLREYK      | PD                        | ..                  | FLFGEAASADIDLAVDY  | TTPKESCDT          | 280    | 280  |
| 73-L.jensenii_27-2-CHN ZP_05557003      | IHLAKADFEQNMPS                  | HGKKGPIVAEPPFFANMPLQTYLHDFVVKTLREYK      | PD                        | ..                  | FLFGEAASADIDLAVDY  | TTPKESCDT          | 276    | 276  |
| 74-L.iners_LEAF_2053A-b ZP_07735311     | IHLAKADFEQNMPS                  | HGKKGPIVAEPPFFANMPLQTYLHDFVVKTLREYK      | PD                        | ..                  | FLFGEAASADIDLAVDY  | TTPKESCDT          | 280    | 280  |
| 75-L.gasseri_JV-V03 ZP_07058635         | IHLAKADFEQNMPS                  | HGKKGPIVAEPPFFANMPLQTYLHDFVVKTLREYK      | PD                        | ..                  | FLFGEAASADIDLAVDY  | TTPKESCDT          | 279    | 279  |
| 76-L.johnsonii_FI9785 YP_003292438      | IHLAKADFEQNMPS                  | HGKKGPIVAEPPFFANMPLQTYLHDFVVKTLREYK      | PD                        | ..                  | FLFGEAASADIDLAVDY  | TTPKESCDT          | 279    | 279  |
| 77-L.amylovorus_DSM_11664 ZP_06818628   | IHLAKADFEQNMPS                  | HGKKGPIVAEPPFFANMPLQTYLHDFVVKTLREYK      | PD                        | ..                  | FLFGEAASADIDLAVDY  | TTPKESCDT          | 279    | 279  |
| 78-L.helveticus_H10 ADX71102            | IHLAKADFEQNMPS                  | HGKKGPIVAEPPFFANMPLQTYLHDFVVKTLREYK      | PD                        | ..                  | FLFGEAASADIDLAVDY  | TTPKESCDT          | 284    | 284  |
| 79-L.acidophilus_NCFM LBA1872           | IHLAKADFEQNMPS                  | HGKKGPIVAEPPFFANMPLQTYLHDFVVKTLREYK      | PD                        | ..                  | FLFGEAASADIDLAVDY  | TTPKESCDT          | 277    | 277  |
| 80-L.amylovorus_GRL1118 AEA32747        | IHLAKADFEQNMPS                  | HGKKGPIVAEPPFFANMPLQTYLHDFVVKTLREYK      | PD                        | ..                  | FLFGEAASADIDLAVDY  | TTPKESCDT          | 279    | 279  |
| consensus                               | * !                             | ** ! ** ** *                             |                           |                     | ***** !            | * * **             | ** *   |      |

↑  
Acid Base



|                                         |     | 340    | 350      | 360    | 370   | 380         | 390      | 400    | 410       |          |        |          |       |          |        |        |        |       |     |
|-----------------------------------------|-----|--------|----------|--------|-------|-------------|----------|--------|-----------|----------|--------|----------|-------|----------|--------|--------|--------|-------|-----|
| 1-L.plantarum ADN99864                  | 353 | KALAL  | LYFNLR   | GCPFIY | QGQEL | GVINARRDS   | ITMEND   | SSHNDY | DRA..I    | EEGY     | SASEAL | AFVNARS  | RDNAR | LPPYWD   | 428    |        |        |       |     |
| 2-L.casei_ATCC_334 ABJ70852             | 357 | KALALL | YFGLRG   | CPFIYQ | QGEEL | GMVNAVVRTN  | IDQFND   | SAHDNY | YRRA..L   | AEGY     | SEADAL | ACVNRRS  | RDNAR | TPYPWD   | 432    |        |        |       |     |
| 3-L.rhamnosus_ATCC_8530 AER64849        | 357 | KALALL | YFCLRG   | CPFIYQ | QGEEL | GMVNAVRRSS  | IDQFND   | SAHDNY | YRRA..L   | AEGY     | SEADAL | ACVNRRS  | RDNAR | TPYPWN   | 432    |        |        |       |     |
| 4-E.italicus_DSM_15952 ZP_07895342      | 342 | TALAT  | MYLLQ    | GTPFIY | QGEEL | GMTNMTFTD   | LDQLDD   | VAKQQI | EELRKLEDS | GE       | RNLEI  | LELMSSIS | RDN   | SRTPMQWS | 420    |        |        |       |     |
| 5-L.sakei_subsp._sakei_23K YP_395811    | 347 | KLLAL  | VEFGLQ   | GTPYIY | QGEEL | IAMKNANFTS  | IDQYQD   | ESINAY | YHQM..L   | ADCI     | SEDLAI | KILQKKS  | R     | NCRI     | IPMQWD | 422    |        |       |     |
| 6-P.larvae ZP_02329600                  | 350 | KMLAT  | TLHLMQ   | GTPYIY | QGEEL | GMTNPFYFSN  | IDQYRD   | ESINAY | YRLL..I   | KQGV     | KETEVA | MAALQKKS | RDN   | SRTPMQWD | 425    |        |        |       |     |
| 7-T.halophilus_NBRC_12172 YP_004886688  | 347 | KALAT  | MYFFMQ   | GTPFIY | QGEEL | GMTNVHFDS   | IDEYDD   | QSVNKA | KATM..I   | KEGS     | KQEAME | EYIWESS  | RDN   | SRTPMQWN | 422    |        |        |       |     |
| 8-B.fuscum BAB60692                     | 366 | TAFAT  | ILHLMR   | GTPYIY | QGEEL | GMTNMPFST   | IDEFRD   | ESLNAY | YRQA..L   | LERD     | GA     | DAATV    | LAGIT | VGG      | RDNAR  | TPVQWD | 442    |       |     |
| 9-H.hydrogeniformans YP_003995944       | 346 | KMLG   | TLHLTR   | GTPFIY | QGEEL | GMTNVSFEN   | LDQYDD   | ETRGYL | NLDL..K   | KKGEM    | TNEML  | KMANYRS  | RDNAR | TPMHWN   | 422    |        |        |       |     |
| 10-L.pentosus_IG1 CCC17113              | 337 | KMLAIT | LHGLK    | GTPFIY | QGEEL | GMTNCPVNS   | IDQYDD   | EARTIY | RQL..R    | QRGD     | DADTAM | QKIN     | VFN   | RDNAR    | TPMQWN | 412    |        |       |     |
| 11-L.plantarum AD000180                 | 337 | KMLA   | IALHGLK  | GTPFIY | QGEEL | GMTDCPVAT   | IDQYND   | VEARTI | YRQL..R   | AQGD     | DAGTAM | QKIN     | IFN   | RDNAR    | TPMQWT | 412    |        |       |     |
| 12-L.pentosus_IG1 CCC16900              | 353 | KMLAT  | CLHLQ    | GTPYIY | QGEEL | GMTDAHFTD   | LDYRD    | ETLNAY | YRDL..V   | TRHLL    | THADMM | ARLAASS  | RDN   | SRTPMQWN | 430    |        |        |       |     |
| 13-L.plantarum ADN97379                 | 353 | KMLAT  | CLHLQ    | GTPYIY | QGEEL | GMTDAHFTD   | LDYRD    | ETLNAY | YRDL..V   | TRHLL    | THADMM | ARLAASS  | RDN   | SRTPMQWD | 430    |        |        |       |     |
| 14-L.rhamnosus_ATCC_8530 AER65504       | 352 | KMLA   | ATLHFLQ  | GTPYIY | QGEEL | GMTNVAFPS   | IDEYRD   | ETLNAY | YHEL..V   | EQHAL    | APDML  | KRIHRS   | RDNAR | TPMQWS   | 429    |        |        |       |     |
| 15-L.brevis_ATCC_367 ABJ65230           | 354 | KMLA   | ITLHMMQ  | GTPYIY | QGEEL | GMTNVHYTQ   | LDQYED   | ESLNAY | YHEL..V   | DDQH     | IVDQPT | MLKYL    | SHIS  | RDNAR    | TPMHWD | 431    |        |       |     |
| 16-L.pentosus_IG1 CCC16895              | 354 | KMLA   | TALHFLQ  | GTPYIY | QGEEL | GMTNAHFDD   | LDYQD    | ESLNAY | YHHF..V   | DDQV     | VVSA   | DKMSY    | LAHTS | RDNAR    | TPMQWD | 431    |        |       |     |
| 17-L.plantarum ADN97381                 | 354 | KMLA   | ITLHFLQ  | GTPYIY | QGEEL | GMTNAHFDD   | LDYQD    | ESLNAY | YHHF..V   | DDQV     | VVSA   | DKMSY    | LAHTS | RDNAR    | TPMQWD | 431    |        |       |     |
| 18-R.lactaris_ATCC_29176 ZP_03168755    | 356 | KMLG   | TCLHMMQ  | GTPYIY | QGEEL | GMTNADFTR   | IEEYKD   | VEALDI | FKDF..T   | TERK     | CF     | SKEDT    | LHL   | LHKS     | RDNAR  | TPMQWD | 432    |       |     |
| 19-D._formicigenerans ZP_02235523       | 355 | KMLG   | TCLHMMQ  | GTPYIY | QGEEL | GMTNADFTR   | IEEYKD   | VEALDI | FKDF..T   | TERK     | CF     | SKEDT    | LHL   | LHKS     | RDNAR  | TPMQWD | 431    |       |     |
| 20-R.torques_ATCC_27756 ZP_01967024     | 353 | KMLG   | TILHMMQ  | GTPYIY | QGEEL | GMTNAHFES   | IDEYKD   | VEALDI | FRDF..T   | TERK     | CF     | SEKDT    | LEL   | LGLKS    | RDNAR  | TPMQWD | 429    |       |     |
| 21-B.coagulans BAA11354 O16G            | 352 | KAFAT  | ILHGLK   | GTPFIY | QGEEL | GMVNADLE    | LEEYDD   | IRNAY  | YQEL..V   | MENQ     | IMSKE  | DEFL     | TAV   | RKKG     | RDNAR  | TPMQWD | 428    |       |     |
| 22-F.prausnitzii_L2-6 CBK98455          | 345 | KMLA   | ICLLSLQ  | GTPYIY | QGEEL | GMTNAYFKD   | LSQYRD   | ESLNAY | YFEL..T   | GALIS    | AD     | EMMEC    | LALRS | RDNAR    | TPVQWD | 421    |        |       |     |
| 23-L.sakei_subsp._sakei_23K CAI56099    | 337 | KMLA   | IYLLHMLK | GTPYIY | QGEEL | GMTNYPITSYH | IEDI     | ESRRVY | YQRR..Q   | QGY      | AISD   | ILNG     | INAKG | RDNAR    | TPMQWN | 412    |        |       |     |
| 24-C.leptum_DSM_753 ZP_02079428         | 377 | KMLA   | TCLHMLQ  | GTPYIY | QGEEL | GMTNPNFSS   | LEDYPD   | EDARQA | YELL..V   | KAQR     | KMSE   | EEFL     | RQV   | NLGR     | DN     | CR     | TPMQWS | 454   |     |
| 25-S.mutans AAA26939 G16G               | 333 | KALA   | ILLHLMR  | GTPYIY | QGEEL | GMTNYPFKD   | NELDD    | ESLNAY | AKEA..F   | TNGK     | SMET   | IMDS     | IRMIG | RDNAR    | TPMQWD | 408    |        |       |     |
| 26-S.mitis_bv._2_str._F0392 EGR94186    | 334 | KAFAT  | ILLHLMR  | GTPYIY | QGEEL | GMTNYPFKD   | NELDD    | ESLNAY | AREA..L   | GKCV     | PMEE   | IMDS     | IRVIC | RDNAR    | TPMQWD | 409    |        |       |     |
| 27-L.pseudomesenteroides ZP_08659173    | 337 | KMLA   | ILLHMMK  | GTPYIY | QGEEL | GMTNTPVKD   | ISLDRD   | ESLNAY | YHDS..L   | KGYL     | SSDA   | ILDQ     | INHKG | RDNAR    | TPIPWR | 413    |        |       |     |
| 28-L.ruminis_ATCC_27782 AEN77768        | 336 | KMLA   | IVLHLLK  | GTPYIY | QGEEL | GMTNCKVED   | ISEVDD   | ESRNMY | YFEE..I   | EKGT     | PKEEL  | INR      | INRKG | RDNAR    | TPMQWD | 411    |        |       |     |
| 29-L.delbrueckii ADQ60220               | 337 | KMLA   | LLHGLR   | GTPYIY | QGEEL | GMTNCPVSA   | IDEVED   | EARMY  | YQER..L   | AEW      | KKED   | LKA      | INARG | RDNAR    | TPMQWD | 412    |        |       |     |
| 30-L.casei_LC2W AEA53469                | 336 | KMFA   | ILLHLLR  | GTPYIY | QGEEL | GMTNAPVAS   | IVVQD    | ESVNMY | YREQ..M   | ALCQ     | SEKT   | ILTA     | INAKG | RDNAR    | TPMQWR | 411    |        |       |     |
| 31-C.sp._DL-VIII ZP_09206015            | 336 | KMFA   | IVLHMMK  | GTPYIY | QGEEL | GMTNIRFEN   | IDEYRD   | ETINMY | NER..K    | KGY      | RHED   | IMNS     | IYAKG | RDNAR    | TPMQWD | 411    |        |       |     |
| 32-C.sp._DL-VIII ZP_09207308            | 336 | KMLA   | TLLHGMK  | GTPYIY | QGEEL | GMTNIRFED   | SDYKD    | ETINMY | NER..L    | AEW      | KKED   | LKA      | INARG | RDNAR    | TPMQWD | 411    |        |       |     |
| 33-L.jensenii_269-3 ZP_04645733         | 326 | KMFA   | IVLHLLK  | GTPYIY | QGEEL | GMTNCPVES   | IDEVND   | ESRNMY | YFAG..L   | EKGT     | PKEEL  | INR      | INRKG | RDNAR    | TPMQWD | 401    |        |       |     |
| 34-L.iners_DSM_13335 ZP_05744409        | 336 | KMFA   | IVLHLMH  | GTPYIY | QGEEL | GMTNSPVKN   | INEVED   | ESINMY | NER..L    | DACY     | DKDEL  | LHA      | INVKG | RDNAR    | TPMQWS | 411    |        |       |     |
| 35-L.johnsonii_DPC_6026 AEB92563        | 336 | KMFA   | IVLHLMH  | GTPYIY | QGEEL | GMTNCPVKS   | IDEVED   | ESINMY | YRER..I   | DKGY     | SKDEL  | LKA      | INTKG | RDNAR    | TPMQWS | 411    |        |       |     |
| 36-L.johnsonii_ATCC_33200 ZP_04006730   | 373 | KMFA   | IVLHLMH  | GTPYIY | QGEEL | GMTNCPVKS   | IDEVED   | ESINMY | YRER..I   | DKGY     | SKDEL  | LKA      | INTKG | RDNAR    | TPMQWS | 448    |        |       |     |
| 37-L.gasseri_ATCC_33323 ABJ59631        | 336 | KMFA   | IVLHLMH  | GTPYIY | QGEEL | GMTNCPVKS   | IDEVED   | ESINMY | YHER..L   | EQGY     | KRAD   | LINS     | INVKG | RDNAR    | TPMQWS | 411    |        |       |     |
| 38-L.amylolyticus_DSM_11664 ZP_06818684 | 336 | KMFA   | IVLHLMH  | GTPYIY | QGEEL | GMTNCPVKS   | IDEVED   | ESINMY | NER..L    | AEW      | KKED   | LKA      | INARG | RDNAR    | TPMQWN | 411    |        |       |     |
| 39-L.acidophilus_NCFM G16G LBA0264      | 336 | KMFA   | IVLHMMH  | GTPYIY | QGEEL | GMTNCPVKN   | IDEVED   | ESINMY | NER..L    | AEW      | KKED   | LKA      | INARG | RDNAR    | TPMQWN | 411    |        |       |     |
| 40-L.amylolyticus_GRL1118 AEA31245      | 336 | KMFA   | IVLHMMH  | GTPYIY | QGEEL | GMTNCPVKS   | IDEVED   | ESINMY | NER..L    | AEW      | KKED   | LKA      | INARG | RDNAR    | TPMQWN | 411    |        |       |     |
| 41-L.crispatus_ST1 CBL49714             | 336 | KMFA   | IVLHMMH  | GTPYIY | QGEEL | GMTNCPVKN   | IDEVED   | ESINMY | NER..L    | AEW      | KKED   | LKA      | INARG | RDNAR    | TPMQWN | 411    |        |       |     |
| 42-Lc.garvieae_ATCC_49156 YP_004779435  | 338 | KMLA   | ILLHMMK  | GTPYIY | QGEEL | GMTNSPVTD   | IEQIDD   | ESRNMY | YFER..L   | EEGY     | SKED   | ILHS     | INVKG | RDNAR    | TPMQWS | 413    |        |       |     |
| 43-E.saccharolyticus_30-1 ZP_09110526   | 336 | KMFA   | IVLHLLK  | GTPYIY | QGEEL | GMTNYPVET   | IEVDD    | ESINMY | NVR..L    | SQGY     | AKED   | ILDS     | INAKG | RDNAR    | TPMQWN | 411    |        |       |     |
| 44-E.italicus_DSM_15952 ZP_07895345     | 335 | KMFA   | IVLHMMK  | GTPYIY | QGEEL | GMTNCPVKS   | IDEVED   | ESINMY | NER..L    | AEW      | KKED   | LKA      | INARG | RDNAR    | TPMQWD | 410    |        |       |     |
| 45-E.faecalis_T2 ZP_05424932            | 338 | KMFA   | IVLHMMK  | GTPYIY | QGEEL | GMTNYPISD   | ISEAED   | ETINMY | NER..L    | SI       | GF     | SKET     | LMES  | INAKG    | RDNAR  | TPMQWD | 413    |       |     |
| 46-E.faecium_TX0133a04 ZP_07845411      | 351 | KMFA   | IVLHMMK  | GTPYIY | QGEEL | GMTNCPIDD   | IAEAKD   | ETINMY | NER..I    | SSGF     | TKEE   | ILS      | INAKG | RDNAR    | TPMQWN | 426    |        |       |     |
| 47-T.halophilus_NBRC_12172 YP_004886502 | 337 | KMLA   | ILLHMMK  | GTPYIY | QGEEL | GMTNTPISD   | ISEAED   | ESINMY | YHER..L   | AKGY     | DKKD   | ILAS     | INAKG | RDNAR    | TPMAWD | 412    |        |       |     |
| 48-E.faecalis_TX0109 ZP_07568166        | 337 | KLFA   | IVLHMMK  | GTPYIY | QGEEL | GMTNTPITD   | IREARD   | ETINMY | HEY..L    | EKGY     | YKEE   | ILK      | INTKG | RDNAR    | TPMQWT | 412    |        |       |     |
| 49-E.saburreum_DSM_3986 ZP_07905892     | 348 | KCTA   | TCLHMMQ  | GTPYIY | QGEEL | GMTNVPFNS   | VDYFRD   | ESVNAY | YREL..I   | ES       | GLYTK  | EDM      | FPK   | IAHKS    | RDNAR  | TPMPWD | 424    |       |     |
| 50-R.sp._5_1_39B_FAA ZP_04856921        | 351 | KMLAT  | CLHMMQ   | GTPYIY | QGEEL | GMTNCPFNT   | DNFRD    | ESINAY | YHEL..T   | EQ       | KMTE   | EDM      | MAA   | IGYK     | RDNAR  | TPMQWD | 427    |       |     |
| 51-T.thermosaccharolyticum YP_003852493 | 349 | KMLA   | TCLHMMQ  | GTPYIY | QGEEL | GMTNVPFQD   | IDEYRD   | ETAVNG | YNEE..V   | IKGR     | SHEQ   | YMY      | IYDFS | RDNAR    | TPMQWD | 425    |        |       |     |
| 52-C.owensensis_OL YP_004001509         | 351 | KMLA   | TLLHLMQ  | GTPYIY | QGEEL | GMTNCKFES   | IDEFRD   | ETLNFY | YREEM..K  | KGM      | SDD    | ELT      | INAKG | RDNAR    | TPMQWN | 426    |        |       |     |
| 53-O._sp._TW25 ZP_08784662              | 350 | KMLA   | TFLHLLQ  | GTPYIY | QGEEL | GMTNVPFES   | IDQYKD   | ETLNMY | YREK..V   | IE       | GNES   | HEK      | VMES  | IYTKG    | RDNAR  | TPMQWD | 426    |       |     |
| 54-B.sp._NRR_LB-14911 ZP_01172682       | 355 | KMLA   | TLLHMMK  | GTPYIY | QGEEL | GMTNVEFPD   | IGDYRD   | ETLNFY | YFRES..T  | EAGV     | PAGK   | AMES     | IYAKG | RDNAR    | TPMQWN | 430    |        |       |     |
| 55-B.sp._2_A_57_CT2 ZP_08004010         | 350 | KMLA   | TLLHMMK  | GTPYIY | QGEEL | GMTNVPFSS   | IEEYRD   | ETLNFY | YKEA..L   | NDGW     | TED    | KALES    | IYAKG | RDNAR    | TPMQWD | 425    |        |       |     |
| 56-B.halodurans_C-125 NP_243769         | 350 | KMLA   | TLLHMMK  | GTPYIY | QGEEL | GMTNVPFSS   | IEEYRD   | ETLNFY | YKEA..L   | NDGW     | TED    | KALES    | IYAKG | RDNAR    | TPMQWD | 425    |        |       |     |
| 57-G.thermoglucosidaseus BAA01368 O16G  | 350 | KMLA   | TFLHMMQ  | GTPYIY | QGEEL | GMTNVPFSS   | IEEYRD   | ETLNMY | YKER..V   | EYGE     | DPQEV  | MEKI     | IYKGR | RDNAR    | TPMQWD | 426    |        |       |     |
| 58-B.cereus_Rock3-44 ZP_04218751        | 355 | KMLA   | TVLHMMK  | GTPYIY | QGEEL | GMTNVHFDS   | IDEYRD   | ETLNMY | YREK..V   | IELGE    | DEE    | KVM      | QSI   | IYKGR    | RDNAR  | TPMQWN | 431    |       |     |
| 59-B.cereus_ATCC_14579 AAP10934 O16G    | 349 | KMLA   | TVLHMMK  | GTPYIY | QGEEL | GMTNVHFES   | IDEYRD   | ETLNMY | YREK..V   | IDHGE    | DI     | EKVM     | QSI   | IYKGR    | RDNAR  | TPMQWN | 425    |       |     |
| 60-Lis.grayi_DSM_20601 ZP_07053050      | 351 | MMLA   | GLMYLQR  | GLPLLY | QGEEL | GMVQLVLMLE  | ITAFQE   | EAARD  | FLREG..Q  | EKGY     | DEQ    | LL       | EAS   | LTSS     | KDAS   | R      | GAMQWE | 426   |     |
| 61-B.coagulans_36D1 YP_004859480        | 356 | KMLA   | TLLMYLQ  | GLPII  | QGEEL | GMVNLKLP    | QVDFSD   | QRAVDL | LISNL..R  | QKGF     | TDKQ   | ILRL     | LNQ   | DEMT     | AR     | G      | PMQWN  | 431   |     |
| 62-C.sp._AT7 ZP_02185859                | 358 | KMLA   | TLLMYLQ  | GLPII  | QGEEL | GMVNLKLP    | QVDFSD   | QRAVDL | LISNL..R  | QKGF     | TDKQ   | ILRL     | LNQ   | DEMT     | AR     | G      | PMQWN  | 431   |     |
| 63-C.sp._17-4 YP_004375075              | 357 | KMLA   | TLLMYLQ  | GLPII  | QGEEL | GMVNLKLP    | QVDFSD   | QRAVDL | LISNL..R  | QKGF     | TDKQ   | ILRL     | LNQ   | DEMT     | AR     | G      | PMQWN  | 432   |     |
| 64-C.sp._AT7 ZP_02185858                | 360 | KMLA   | TLLMYLQ  | GLPII  | QGEEL | GMVNLKLP    | QVDFSD   | QRAVDL | LISNL..R  | QKGF     | TDKQ   | ILRL     | LNQ   | DEMT     | AR     | G      | PMQWN  | 435   |     |
| 65-L.farciminis_KCTC_3681 ZP_08576747   | 353 | KL     | LAMLL    | FLQRG  | IPVIY | QGEEL       | GMHGLKYQ | VADFSD | QRAVDL    | LISNL..R | QKGF   | TDKQ     | ILRL  | LNQ      | DEMT   | AR     | G      | PMQWD | 428 |
| 66-L.pentosus_MP-10 CCB83116            | 358 | KALATA | LALYLQR  | GTPYIY | QGEEL | GLTNIRYQK   | LADFED   | QTVPTF | VKSA..Q   | AAGK     | TMPE   | IM       | TMLN  | KTH      | MAC    | R      | G      | PMQWD | 433 |
| 67-L.plantarum YP_003061749             | 358 | KALATA | LALYLQR  | GTPYIY | QGEEL | GLTNIRYQK   | LADFED   | QTVPTF | VKSA..Q   | AAGK     | TMPE   | IM       | TMLN  | KTH      | MAC    | R      | G      | PMQWD | 433 |
| 68-L.ruminis_SPM0211 ZP_08562977        | 357 | KMLA   | TLLMYLQ  | GLPII  | QGEEL | GMVNLKLP    | QVDFSD   | QRAVDL | LISNL..R  | QKGF     | TDKQ   | ILRL     | LNQ   | DEMT     | AR     | G      | PMQWN  | 432   |     |
| 69-L.animalis_KCTC_3501 ZP_08548669     | 355 | KMLA   | TLLMYLQ  | GLPII  | QGEEL | GMVNLKLP    | QVDFSD   | QRAVDL | LISNL..R  | QKGF     | TDKQ   | ILRL     | LNQ   | DEMT     | AR     | G      | PMQWN  | 430   |     |
| 70-L.pentosus_IG1 CCC16918              | 354 | KCLAT  | MLYLQR   | GIPVIY | QGEEL | GMVNLKLP    | QVDFSD   | QRAVDL | LISNL..R  | QKGF     | TDKQ   | ILRL     | LNQ   | DEMT     | AR     | G      | PMQWN  | 429   |     |
| 71-L.casei_ATCC_334 YP_0806220          | 352 | RSLA   | VLMYLQR  | GIPVIY | QGEEL | GMVNLKLP    | QVDFSD   | QRAVDL | LISNL..R  | QKGF     | TDKQ   | ILRL     | LNQ   | DEMT     | AR     | G      | PMQWN  | 427   |     |
| 72-L.delbrueckii ZP_07091943            | 351 | RSLA   | MAMYLQR  | GIPVIY | QGEEL | GMVNLKLP    | QVDFSD   | QRAVDL | LISNL..R  | QKGF     | TDKQ   | ILRL     | LNQ   | DEMT     | AR     | G      | PMQWN  | 426   |     |
| 73-L.jensenii_27-2-CHN ZP_05557003      | 349 | RSLA   | MMLYLQR  | GIPVIY | QGEEL | GMVNLKLP    | QVDFSD   | QRAVDL | LISNL..R  | QKGF     | TDKQ   | ILRL     | LNQ   | DEMT     | AR     | G      | PMQWN  | 424   |     |
| 74-L.iners_LEAF_2053A-b ZP_07735311     | 353 | RGLA   | MMLYLQR  | GIPVIY | QGEEL | GMVNLKLP    | QVDFSD   | QRAVDL | LISNL..R  | QKGF     | TDKQ   | ILRL     | LNQ   | DEMT     | AR     | G      | PMQWN  | 428   |     |
| 75-L.gasseri_JV-V03 ZP_07058635         | 352 | RSLA   | MMLYLQR  | GIPVIY | QGEEL | GMVNLKLP    | QVDFSD   | QRAVDL | LISNL..R  | QKGF     | TDKQ   | ILRL     | LNQ   | DEMT     | AR     | G      | PMQWN  | 427   |     |
| 76-L.johnsonii_FI9785 YP_003292438      | 352 | RSLA   | MMLYLQR  | GIPVIY | QGEEL |             |          |        |           |          |        |          |       |          |        |        |        |       |     |

|                                         | 420 | 430  | 440           | 450                    | 460                         | 470           | 480          |             |        |             |        |
|-----------------------------------------|-----|------|---------------|------------------------|-----------------------------|---------------|--------------|-------------|--------|-------------|--------|
| 1-L.plantarum ADN99864                  | 429 | DSV  | NGGFNQGAKPWIT | PKQSHDRVNWQAEQLD       | SNVWHFYQSLIKLRQISN          | LSQDLIVGDFRPI | ITCDCDQVIA   | YQR         | 504    |             |        |
| 2-L.casei_ATCC_334 ABJ70852             | 433 | DSQ  | NGGFNAGHEPWLP | LAKQAAGVNWQAEHDD       | PNSVWTFYQTLCLRNASP          | LRADLIEGDFAP  | DAHNDNVIA    | YAR         | 508    |             |        |
| 3-L.rhamnosus_ATCC_8530 AER64849        | 433 | DEA  | NGGFSDH.QPWL  | VAAQAPGVNWQDEQAD       | PDVWHFYQKLCQLRNDSP          | LRSDLIDGDFAP  | TVADHVAIA    | YAR         | 507    |             |        |
| 4-E.italicus_DSM_15952 ZP_07895342      | 421 | TEE  | NAGFSTA.EPWL  | VNPNYEEINVAQAQ         | KQPNSILSYKQLIQLRKNRA        | V...FVTG      | HYHDYLLDDPKV | VYVER       | 492    |             |        |
| 5-L.sakei_subsp._sakei_23K YP_395811    | 423 | MTA  | NHGFTTG.MPWL  | QPVVADY...SVATKAQAPD   | SFAFYQQLVALRKTEP            | V...LIEG      | QYQLAPEDEAV  | YTYQR       | 493    |             |        |
| 6-P.larvae ZP_02329600                  | 426 | DTE  | QGGFTNG.EPWIK | LAPSESSVNVKNE          | NDPDSIFHHYRNLIQLRKEYD       | I...IAYG      | DYNLLADHPEL  | FAYVR       | 497    |             |        |
| 7-T.halophilus_NBRC_12172 YP_004886688  | 423 | STE  | QAGFTTG.TPWLK | VNDNYADINVAESYED       | PNSVYNFYKMKMID              | IRRRSE        | T...LIYGT    | YELIEEKHPSV | YAYLR  | 494         |        |
| 8-B.fuscum BAB60692                     | 443 | ASV  | HAGFTTG.EPWIP | VNPNHGWLNAATQRQD       | PEVYGYWYKRLIQLRHEEP         | V...IVDGR     | FNLILADDPQI  | FAYTR       | 514    |             |        |
| 9-H.hydrogeniformans YP_003995944       | 423 | DSK  | YAGFSNV.EPWLQ | MNDNYPEINVAR           | DKSDSVFKYYQKLISLRKEYP       | V...FVYG      | KYKILLEDDQN  | IYTYIR      | 494    |             |        |
| 10-L.pentosus_IG1 CCC17113              | 413 | DDP  | YAGFSTT.QPWL  | S...VNPNYREINVASAQARRQ | SLWVYKQLIALRHQEP            | V...LQNG      | KFEALPAMPASV | MYTR        | 484    |             |        |
| 11-L.plantarum AD000180                 | 413 | AKQ  | HAGFTTG.KPWLA | VNPNYPRINVAQAQ         | DHQSIFWYTYQRLIRLRKQSA       | V...LQQG      | EFTLESAVPSPI | VAYTR       | 484    |             |        |
| 12-L.pentosus_IG1 CCC16900              | 431 | ATE  | NAGFSDA.QPWIK | VTPNYQQINAEAA          | ADPHSVWYTYQQLIKLRHHYP       | I...VTLG      | TFKLLADDTQV  | FMYER       | 502    |             |        |
| 13-L.plantarum ADN97379                 | 431 | TEV  | NAGFSDA.APWL  | T...VNPNYRQINAAAA      | ADPDVWYTYQHLIQLRHQYP        | L...VTLG      | SFELWADDPQV  | FLYAR       | 502    |             |        |
| 14-L.rhamnosus_ATCC_8530 AER65504       | 430 | TAP  | QAGFTAG.TPWLA | VNPNYPDINATAAL         | ADSDVFFFYQKLIQLRKQYPD       | L...IVYGA     | YTLDSDDPDV   | MYQR        | 502    |             |        |
| 15-L.brevis_ATCC_367 ABJ65230           | 432 | DTT  | NAGFTTG.QPWFA | VNPNYPTINAAADQ         | DQDSDVFNYYRRLIALRHSSD       | L...IVLGS     | YEELEPKDDQV  | FAYKR       | 503    |             |        |
| 16-L.pentosus_IG1 CCC16895              | 432 | DSA  | NAGFSTA.TPWLA | VNPNYPRINVAQAQ         | LRTPGVSFGYTYQRLIKLRHQPL     | V...ITTG      | TYRLLPEDRSV  | YAYMR       | 503    |             |        |
| 17-L.plantarum ADN97381                 | 432 | DSQ  | NAGFSTA.TPWLA | VNPNYPRINVAQAQ         | LRTPGVSLSYTYQRLIKLRHHLP     | V...ITTG      | TYHLSPDDAAV  | YAYVR       | 503    |             |        |
| 18-R.lactaris_ATCC_29176 ZP_03168755    | 433 | ASE  | NAGFSEA.QPWIR | VNPNYKVINVENA          | ADSDVFFFYQKLIALRHLP         | I...ITDGV     | YELDAENEKI   | YAYLR       | 504    |             |        |
| 19-D._formicigenerans ZP_02235523       | 432 | DIR  | HAGFTEG.IPWID | VNPNYTEINAEKAL         | EDSDVFNYYRRLIALRHHSV        | V...ITDGV     | YELDAENEKI   | YAYLR       | 503    |             |        |
| 20-R.torques_ATCC_27756 ZP_01967024     | 430 | NTV  | NAGFTEG.TPWIG | VNKNCKEINVEQCL         | ADQDSIFYYYQKLIQLRHMP        | I...ITDGV     | YELDAENEKI   | YAYLR       | 501    |             |        |
| 21-B.coagulans BAA11354 O16G            | 429 | GSF  | NAGFTTG.TPWIK | VNSRYSEINVAQAQ         | QEPDSIFYYYQSLIKLRHSYD       | V...FTDGR     | YELMPDHPHY   | VYTR        | 500    |             |        |
| 22-F.prausnitzii_L2-6 CBK98455          | 422 | DSP  | NAGFTTG.TPWIE | VNPNYTINAAAEK          | DPDVLNYYKQMITLRKSHL         | G...LIYGS     | FQLAEENPQV   | FAYRR       | 493    |             |        |
| 23-L.sakei_subsp._sakei_23K CAI56099    | 413 | GKN  | QSGFTDG.TPWLP | VNPNYEINVAQAQ          | EDSDVFNYYRRLIALRHNSA        | I...IVYGR     | FEVPTGNQV    | ISYKR       | 484    |             |        |
| 24-C.leptum_DSM_753 ZP_02079428         | 455 | GQK  | NGGFTAG.EPWIK | VNPNYQRINVAQAQ         | GRPDSVFSYTYQRLIRLRKTYE      | I...ITEG      | TYELDSGNSV   | WYAYQR      | 526    |             |        |
| 25-S.mutans AAA26939 G16G               | 409 | ASQ  | NAGFSTADKTWLP | VNPNYKVINVAQAQ         | KVNSIFYTYQQLIQLRKEND        | W...LVDAD     | FELPTADKVF   | AYLR        | 480    |             |        |
| 26-S.mitis_bv._2_str._F0392 EGR94186    | 410 | ESK  | NAGFSTG.KPWLA | VNPNYEINVEAAL          | ADPDVFFFYQKLIQLRKNS         | W...LIRAD     | FELDTADKVF   | AYIR        | 480    |             |        |
| 27-L.pseudomesenteroides ZP_08659173    | 414 | NSL  | NGGFTDV.IPWID | VNSNYPDINVAQAQ         | EDSDVFNYYRRLIALRHNSA        | I...IVYGR     | FELPTGNQV    | ISYKR       | 484    |             |        |
| 28-L.ruminis_ATCC_27782 AEN77768        | 412 | GTE  | NAGFTKG.TPWHL | VNPNYHTINAKAC          | EDENSIFYTYKKLIDYRKKND       | I...VVYGD     | YEMVDDVPDD   | VYVLR       | 483    |             |        |
| 29-L.delbrueckii ADQ60220               | 413 | ASA  | SAGFTSG.RPWLA | VNPNCQVINVAQAQ         | EDSDVFNYYRRLIALRHNSA        | I...LTDGS     | FELDTADAV    | YVHR        | 483    |             |        |
| 30-L.casei_LC2W AEA53469                | 412 | DAP  | NAGFTTS.QPWLR | VNPNYHTINVAQAQ         | EDSDVFNYYRRLIALRHNSA        | I...IVNGR     | FEALENLAPAV  | YAYR        | 483    |             |        |
| 31-C.sp._DL-VIII ZP_09206015            | 412 | DNE  | NAGFTTG.EPWIK | VNPNYKEINAKSAL         | EDENSIFYTYQKLIQLRKNSP       | V...VVYGR     | FELLEGSEI    | FAYTR       | 483    |             |        |
| 32-C.sp._DL-VIII ZP_09207308            | 412 | DSK  | NAGFTTG.EPWIK | VNPNYKEINAKSAL         | EDENSIFYTYQKLIQLRKNSP       | V...VVYGR     | FELLEGSEI    | FAYTR       | 483    |             |        |
| 33-L.jensenii_269-3 ZP_04645733         | 402 | DTA  | NAGFTTG.KPWHL | VNPNYREINVAQAQ         | EDSDVFNYYRRLIALRHNSA        | I...LVDG      | DFKAVATSDN   | FAYER       | 472    |             |        |
| 34-L.iners_DSM_13335 ZP_05744409        | 412 | DAL  | NAGFTTG.KPWHL | VNSNYTDINVAQAQ         | EDSDVFNYYRRLIALRHNSA        | I...VVDG      | DFQLTEETAQ   | ILAYR       | 483    |             |        |
| 35-L.johnsonii_DPC_6026 AEB92563        | 412 | NGE  | NAGFTTG.TPWIK | VNPNYKTINVAQAQ         | EDSDVFNYYRRLIALRHNSA        | I...VVDG      | DFELVENTSDN  | ILAFWR      | 483    |             |        |
| 36-L.johnsonii_ATCC_33200 ZP_04006730   | 449 | NGE  | NAGFTTG.TPWIK | VNPNYKTINVAQAQ         | EDSDVFNYYRRLIALRHNSA        | I...VVDG      | DFELVENTSDN  | ILAFWR      | 520    |             |        |
| 37-L.gasseri_ATCC_33323 ABJ59631        | 412 | NEE  | NAGFTSG.NPWIK | VNPNYKVINVAQAQ         | EDSDVFNYYRRLIALRHNSA        | I...VVDG      | DFELVENTSDN  | ILAFWR      | 483    |             |        |
| 38-L.amylolyticus_DSM_11664 ZP_06818684 | 412 | DQP  | NAGFTKG.KPWLA | VNPNYKVINVAQAQ         | EDSDVFNYYRRLIALRHNSA        | I...VVDG      | DFELVENTSDN  | ILAFWR      | 483    |             |        |
| 39-L.acidophilus_NCFM G16G LBA0264      | 412 | DEK  | NAGFSEV.DPWLS | VNPNYKVINVAQAQ         | EDSDVFNYYRRLIALRHNSA        | I...VVDG      | DFELVENTSDN  | ILAFWR      | 483    |             |        |
| 40-L.amylolyticus_GRL1118 AEA31245      | 412 | DDK  | NAGFSDV.RPWLA | VNSNYVDINVAQAQ         | EDSDVFNYYRRLIALRHNSA        | I...VVDG      | DFELVENTSDN  | ILAFWR      | 483    |             |        |
| 41-L.crispatus_ST1 CBL49714             | 412 | DEK  | NAGFTKS.KPWLT | VNPNYKEINVAQAQ         | EDSDVFNYYRRLIALRHNSA        | I...VVDG      | DFELVENTSDN  | ILAFWR      | 483    |             |        |
| 42-Lc.garvieae_ATCC_49156 YP_004779435  | 414 | NAK  | AAGFTG.HPWLA  | VNPNYEINVAQAQ          | EDSDVFNYYRRLIALRHNSA        | I...IIVGE     | FELKDTTEE    | VYAYIR      | 485    |             |        |
| 43-E.saccharolyticus_30-1 ZP_09110526   | 412 | DSK  | NAGFTSN.KPWHL | VNPNYPEINVAQAQ         | EDSDVFNYYRRLIALRHNSA        | I...VVGTY     | NLVDTEDE     | NFAYCR      | 483    |             |        |
| 44-E.italicus_DSM_15952 ZP_07895345     | 411 | NSA  | HAGFTTG.TPWHL | VNPNYEINVAQAQ          | EDSDVFNYYRRLIALRHNSA        | I...VVGTY     | NLVDTEDE     | NFAYCR      | 482    |             |        |
| 45-E.faecalis_T2 ZP_05424932            | 414 | NSE  | NAGFTTG.TPWHL | VNPNYREINVAQAQ         | EDSDVFNYYRRLIALRHNSA        | I...VVGTY     | NLVDTEDE     | NFAYCR      | 485    |             |        |
| 46-E.faecium_TX0133a04 ZP_07845411      | 427 | ARE  | HAGFTTG.IPWLR | VNPNYKEINVAQAQ         | EDSDVFNYYRRLIALRHNSA        | I...IVWGD     | YELVEKTP     | EHVAYS      | 498    |             |        |
| 47-T.halophilus_NBRC_12172 YP_004886502 | 413 | SST  | NAGFTSG.KPWLA | VNDNYKVINVAQAQ         | EDSDVFNYYRRLIALRHNSA        | I...MIWGS     | FQLDVTDE     | VFSYR       | 483    |             |        |
| 48-E.faecalis_TX0109 ZP_07568166        | 413 | AEK  | NAGFTTG.IPWID | VNPNYKVINVAQAQ         | EDSDVFNYYRRLIALRHNSA        | I...IVWGD     | FELVENTSDN   | ILAFWR      | 483    |             |        |
| 49-E.saburreum_DSM_3986 ZP_07905892     | 425 | TSE  | NAGFTTG.TPWLA | VNPNYKVINVAQAQ         | EDSDVFNYYRRLIALRHNSA        | I...IVYGR     | FELVENTSDN   | ILAFWR      | 496    |             |        |
| 50-R.sp._5_1_39B_FAA ZP_04856921        | 428 | DSA  | YAGFSTA.NPWIM | VNPNYTKINAKDQ          | INREDSVFKYYQKLIQLRHNSA      | L...IVYGT     | YDLDDDKD     | IYAYIR      | 499    |             |        |
| 51-T.thermosaccharolyticum YP_003852493 | 426 | DDP  | NGGFTTG.KPWIK | VNPNYTKINAKDQ          | INREDSVFKYYQKLIQLRHNSA      | L...IIVGD     | FELVENTSDN   | ILAFWR      | 497    |             |        |
| 52-C.owensensis_OL YP_004001509         | 427 | DSE  | NAGFTTG.KPWIK | VNPNYTKINAKDQ          | INREDSVFKYYQKLIQLRHNSA      | L...IIVGD     | FELVENTSDN   | ILAFWR      | 498    |             |        |
| 53-O._sp._TW25 ZP_08784662              | 427 | ASE  | HAGFTTG.TPWLE | VNPNYKEINVAQAQ         | EDSDVFNYYRRLIALRHNSA        | I...MVYGE     | YELVENTSDN   | ILAFWR      | 498    |             |        |
| 54-B.sp._NRR_LB-14911 ZP_01172682       | 431 | SSE  | NAGFTTG.TPWIG | VNPNYKEINVAQAQ         | EDSDVFNYYRRLIALRHNSA        | I...IVYGR     | FELVENTSDN   | ILAFWR      | 502    |             |        |
| 55-B.sp._2_A_57_CT2 ZP_08004010         | 426 | SSE  | HGGFSDG.TPWIK | VNPNYKVINVAQAQ         | EDSDVFNYYRRLIALRHNSA        | I...IVYGR     | FELVENTSDN   | ILAFWR      | 497    |             |        |
| 56-B.halodurans_C-125 NP_243769         | 426 | ETK  | HGGFTDG.TPWLE | VNPNYKEINVAQAQ         | EDSDVFNYYRRLIALRHNSA        | I...LVHGS     | YDLDDDKD     | IYAYIR      | 497    |             |        |
| 57-G.thermoglucosidarius BAA01368 O16G  | 427 | DSE  | NAGFTAG.TPWIP | VNPNYKEINVAQAQ         | EDSDVFNYYRRLIALRHNSA        | I...IVYGT     | YDLDDDKD     | IYAYIR      | 498    |             |        |
| 58-B.cereus_Rock3-44 ZP_04218751        | 432 | ANE  | HAGFTAG.EPWIG | VNPNYKEINVAQAQ         | EDSDVFNYYRRLIALRHNSA        | I...IVYGT     | YDLDDDKD     | IYAYIR      | 503    |             |        |
| 59-B.cereus_ATCC_14579 AAP10934 O16G    | 426 | DQN  | HAGFTKG.EPWIT | VNPNYKEINVAQAQ         | EDSDVFNYYRRLIALRHNSA        | I...VVYGS     | YDLDDDKD     | IYAYIR      | 497    |             |        |
| 60-Lis.grayi_DSM_20601 ZP_07053050      | 427 | NTD  | YAGFSET.APWGS | VNVEEK.YNVADQ          | QSDPNSILSYKQLIQLRKNSA       | E...FLAG      | NWEMIDT      | GELPLFR     | 493    |             |        |
| 61-B.coagulans_36D1 YP_004859480        | 432 | NDR  | YCGFSTY.APWIG | VNVEEK.YNVADQ          | QSDPNSILSYKQLIQLRKNSA       | E...FTAG      | SWEMLE       | ADDPDI      | YAYIR  | 503         |        |
| 62-C.sp._AT7 ZP_02185859                | 434 | RSE  | FAGFSTV.KPWSG | VNVEEK.YNVADQ          | QSDPNSILSYKQLIQLRKNSA       | E...FNKGS     | FKLHDTKDT    | LYVYER      | 502    |             |        |
| 63-C.sp._17-4 YP_004375075              | 433 | NSK  | YAGFSTH.RPWSG | VNVEEK.YNVADQ          | QSDPNSILSYKQLIQLRKNSA       | E...FTIEG     | DFKLHDTKDT   | LYVYER      | 501    |             |        |
| 64-C.sp._AT7 ZP_02185858                | 436 | DSN  | YAGFSSH.VPWSG | VNVEEK.YNVADQ          | QSDPNSILSYKQLIQLRKNSA       | E...FSEGG     | FQLHDTKDT    | LYVYER      | 504    |             |        |
| 65-L.farciminis_KCTC_3681 ZP_08576747   | 429 | STQ  | YRGSFKE.KPWNL | VNDQETADPDS            | IMNFFYKQLIQLRKNSA           | D...FTS       | GDYRLL       | ITDSN       | IYAYR  | 496         |        |
| 66-L.pentosus_MP-10 CCB83116            | 434 | SST  | YHGFSDH.LPWKH | ...GQTDQMNAADE         | IDDSDIYNYYRQLIQLRKNSA       | ...FTD        | GQFIML       | GSNDQ       | LFTYLI | 501         |        |
| 67-L.plantarum YP_003061749             | 434 | NTV  | YHGFSDH.LPWKH | ...GQTDQMNAADE         | IDDSDIYNYYRQLIQLRKNSA       | ...FTN        | GQFIML       | GSNDQ       | LFTYLI | 501         |        |
| 68-L.ruminis_SPM0211 ZP_08562977        | 433 | ESE  | YHGFSDH.LPWKH | ...GQTDQMNAADE         | IDDSDIYNYYRQLIQLRKNSA       | ...FVEGN      | FVLA         | DTTDD       | LYVYKR | 500         |        |
| 69-L.animalis_KCTC_3501 ZP_08548669     | 431 | TIA  | YAGFSKV.KPWKW | ...SKDENVASIAEQ        | MDPDSVLFYKQLIQLRKNSA        | ...FIQGR      | FIL          | NTSSE       | IYAYR  | 499         |        |
| 70-L.pentosus_IG1 CCC16918              | 430 | QQQN | NAGFSEH.TPWLS | ...GKTHLVDVATEED       | ADSLNFFYRSLIKLRKNSA         | E...FTS       | GTEIK        | NTPQG       | IYAYR  | 498         |        |
| 71-L.casei_ATCC_334 YP_086220           | 428 | ATT  | NSGFTSG.TPWLP | ...VGRSSRTHVVEQ        | QHPDSSLAFYKQLIQLRKNSA       | S...FQT       | GSFRL        | STGPD       | SYVYLR | 496         |        |
| 72-L.delbrueckii ZP_07091943            | 427 | DSQ  | YDGFSTA.EPWL  | ...GRSRDHFVASE         | ADPSSMLNFFYRQLIQLRKNSA      | P...FTK       | GSYLL        | DTKAD       | LVYQR  | 495         |        |
| 73-L.jensenii_27-2-CHN ZP_05557003      | 425 | KTE  | NYGFSKR.KPWLT | ...GKKQDEHFAEAE        | ADADSFNFFYRQLIQLRKNSA       | P...FMEG      | SYLH         | PTSNK       | SFYQR  | 493         |        |
| 74-L.iners_LEAF_2053A-b ZP_07735311     | 429 | DSQ  | YDGFSTA.EPWL  | ...GVPANADNVAGEEN      | DNSVLFNFFYRQLIQLRKNSA       | D...FTN       | GTYL         | DTNKY       | TYVYER | 497         |        |
| 75-L.gasseri_JV-V03 ZP_07058635         | 428 | NAK  | NGFSDG.KPWIK  | ...GKKVDHANA           | AADEIADSSMFFNFFYRQLIQLRKNSA | A...FED       | GGYLL        | PTSDN       | SYVYER | 496         |        |
| 76-L.johnsonii_FI9785 YP_003292438      | 428 | NER  | NGFSDG.KPWIK  | ...GKKVDHANA           | AADEIADSSMFFNFFYRQLIQLRKNSA | A...FED       | GGYLL        | PTSDN       | SYVYER | 496         |        |
| 77-L.amylolyticus_DSM_11664 ZP_06818628 | 428 | NDK  | FNGFSDG.KPWIK | ...GKVDHANA            | AADEIADSSMFFNFFYRQLIQLRKNSA | A...FED       | GGYLL        | PTSDN       | SYVYER | 496         |        |
| 78-L.helveticus_H10 ADX71102            | 433 | DTK  | NYGFTG.TPWIN  | ...GKIENHVS            | VASEITSDSMLFFYKQLIQLRKNSA   | N...FQK       | GDYML        | PTDKN       | SYVYQR | 501         |        |
| 79-L.acidophilus_NCFM LBA1872           | 426 | DTK  | NYGFTG.TPWIN  | ...GKIENHVS            | VASEITSDSMLFFYKQLIQLRKNSA   | N...FQK       | GDYML        | PTDKN       | SYVYQR | 494         |        |
| 80-L.amylolyticus_GRL1118 AEA32747      | 427 | DTK  | NYGFTG.TPWIN  | ...GKIENHVS            | VASEITSDSMLFFYKQLIQLRKNSA   | N...FQK       | GDYML        | PTDKN       | SYVYQR | 495         |        |
| consensus                               |     | *    | ***!!*        | !!*                    | ** **                       | ***           | * *          | !!** *      | ** **  | * ** ! * ** | ** ! * |

|                                         | 490 | 500              | 510         | 520            | 530                   |                |                    |                  |     |
|-----------------------------------------|-----|------------------|-------------|----------------|-----------------------|----------------|--------------------|------------------|-----|
| 1-L.plantarum ADN99864                  | 505 | G....RRVQVYVNL   | SAKRLFLT    | PNG.....RPR    | LNYY..AHYRLN          | .....TLEPYQAT  | FEVNSNE.           | 555              |     |
| 2-L.casei_ATCC_334 ABJ70852             | 509 | G....QHVQIFVNL   | SSKPAAVD    | LPAG.....HVV   | LNYY..SDVGT           | .....SLQPYQAT  | IEVVK...           | 555              |     |
| 3-L.rhamnosus_ATCC_8530 AER64849        | 508 | G....KHLRIYVNL   | SATPATID    | LPDG.....QVW   | LNYY..PDAAP           | .....TLKPYQAT  | IEVNV...           | 554              |     |
| 4-E.italicus_DSM_15952 ZP_07895342      | 493 | FLGT..ERMLVVVNL  | KDAAEID     | LPAAISGQSW     | TLVIDNH..SVEGANSEHELQ | LTQHKTMA       | LAPYEARVYHMNRVK    | 567              |     |
| 5-L.sakei_subsp._sakei_23K YP_395811    | 494 | QLGD..KKVRVIANF  | TDQTTQRANA  | AAVK.....AVMMS | SNY..PDQQLT           | TDQI.....TLR   | PYEAVMLEIE...      | 549              |     |
| 6-P.larvae ZP_02329600                  | 498 | SFGK..ERLLVSNF   | SSRTTSFT    | PPEGLDAGKETT   | LLISNY..PDTNEY        | LSEF.....VLR   | PYESAAYYCRD...     | 560              |     |
| 7-T.halophilus_NBRC_12172 YP_004886688  | 495 | HGEQ..EDFLIMVNM  | FDGREKMD    | FSKYN...LK     | ELVLANY..EVNDR        | LNSI.....L     | LRPYEARNYKISK...   | 553              |     |
| 8-B.fuscum BAB60692                     | 515 | TSDS..TELFIAANCS | ADPAALPG    | DVTEEWDDA      | DVLLIANH..PGVREL      | ...GR.....T    | LLPWEVILRRGLA...   | 575              |     |
| 9-H.hydrogeniformans YP_003995944       | 495 | EGKE..NNLLIMLNF  | SEQLAEVD    | LEDELEIQNA     | ELLINNY..NNEPEF       | RSKS.....Q     | LNPYEARVYLFQ...    | 555              |     |
| 10-L.pentosus_IG1 CCC17113              | 485 | TWKQ..TQWLVCNYS  | QAQVSVK     | LPQSK...S      | TLVISNY..PDGPGQ       | LGQT.....V     | LRPYEARVVALN...    | 541              |     |
| 11-L.plantarum AD000180                 | 485 | NWQQ..QVWLICANF  | ADTLITVD    | LPKRA...S      | ELIISNY..QDYPEQ       | LGRV.....V     | LRPYEARVVALS...    | 541              |     |
| 12-L.pentosus_IG1 CCC16900              | 503 | HWQG..QVWLICANF  | TSETISRPL   | HQYL.TADA      | KCLLSNY..DDCQTD       | .....TLR       | PYEARVYQLA...      | 558              |     |
| 13-L.plantarum ADN97379                 | 503 | QWEG..RTWLVCCNF  | AETLSRPL    | DQYL.TPTA      | KCLISNY..GEQQPN       | .....K         | LRPYEARVYQLA...    | 558              |     |
| 14-L.rhamnosus_ATCC_8530 AER65504       | 503 | QAAN..QELLVISNF  | TDLTRN      | IAKKL.SPSA     | KLLISNY..DDDAEN       | .....TLR       | PYETKAYLIER...     | 560              |     |
| 15-L.brevis_ATCC_367 ABJ65230           | 504 | HYQE..QTLVLSNF   | TQVTRDYG    | QAEAS...E      | ERLIGNY..ADDQGT       | .....TLR       | PYETKAYVYFK...     | 557              |     |
| 16-L.pentosus_IG1 CCC16895              | 504 | QAGD..QHLLVICNF  | TATQTRHFAEL | PATA...K       | LLLSNY..DEDHQD        | .....V         | LRAVEAKVYQF...     | 557              |     |
| 17-L.plantarum ADN97381                 | 504 | HMGS..QHLLVICNF  | TATQTRHFAEL | PADA...H       | LLISNY..DEDHQD        | .....V         | LRAVEAKVYQF...     | 557              |     |
| 18-R.lactaris_ATCC_29176 ZP_03168755    | 505 | KGEK..ESLIVLCNF  | TETVEYEV    | DESVKAERS      | ELVISNY..KDAPEK       | FASKI.....T    | KPYGAYVYTK...      | 566              |     |
| 19-D._formicigenerans ZP_02235523       | 504 | KGEN..ESLIVCANF  | TDEIDYQV    | DEKVKAKES      | SLLISNY..GDAPDT       | FNNHL.....T    | KPYDALVVAIGNEEK    | 548              |     |
| 20-R.torques_ATCC_27756 ZP_01967024     | 502 | KGEK..ETLVVGNF   | TDKTINYH    | IEEKVQAKKS     | RLLISNY..NAAET        | FERDL.....S    | LEPYGACVYLLAEK     | 565              |     |
| 21-B.coagulans BAA11354 O16G            | 501 | ENES..EKLVAAANF  | SENTVSFD    | QPPDDN...W     | KLLIGNY..EDT...GT     | ST.....L       | FRPYEARVYYLEK...   | 555              |     |
| 22-F.prausnitzii_L2-6 CBK98455          | 494 | TLAETGENYL       | IACNFS      | DKDAAF         | TIPADF..AGA           | RRLISNY..PDTAP | ...TGAV.....T      | LRPYEARVYVYTK... | 552 |
| 23-L.sakei_subsp._sakei_23K CAI56099    | 485 | MLGE..QVWLIVCANF | TDEIDYQV    | DEKVKAKES      | SLLISNY..GDAPDT       | FNNHL.....T    | KPYDALVVAIGNEEK    | 548              |     |
| 24-C.leptum_DSM_753 ZP_02079428         | 527 | VWNR..ERLLVLANF  | SQAEACPL    | AKNPEVTR..Q    | LLISNY..DDVKSE        | .....TLR       | PYEARVAFYERERAD    | 586              |     |
| 25-S.mutans AAA26939 G16G               | 481 | KVRE..ERYLVVNV   | SDQEEVLE    | IDVDK...Q      | ETLISNT..NESAA        | LANH...K       | LQPVDAFCIKIN...    | 536              |     |
| 26-S.mitis_bv._2_str._F0392 EGR94186    | 481 | KDGE..RRFLVVANF  | SNEKQNF     | VEGRV...K      | SLLIENY..TAKEA        | VEKQ...T       | LAPWDAFCVEMTD...   | 537              |     |
| 27-L.pseudomesenteroides ZP_08659173    | 485 | HYHD..LTWLVVSNF  | TQVTRDYG    | QAEAS...E      | ATLVANY..DEPKN        | LHNK...I       | LQPYEARVYVYTKL     | 543              |     |
| 28-L.ruminis_ATCC_27782 AEN77768        | 484 | KYRG..QMLLVCANF  | TNEFRINL    | DKFG...RQ      | TSFISNY..DEGVID       | LSSK...V       | LKPYEARVAFIEVK...  | 541              |     |
| 29-L.delbrueckii ADQ60220               | 484 | ENTE..DKWLVVCF   | NLTGEEQVFL  | PKDV...K       | EVLISNY..PVPED        | LSAA...V       | LPAYAFCVCRVKK...   | 540              |     |
| 30-L.casei_LC2W AEA53469                | 484 | VLGH..TRWLVVNV   | SEKRRPLD    | NDQL...E       | KTVISNY..DAPLQS       | LTDQ...T       | LQPYEARVAFVYRHV... | 541              |     |
| 31-C.sp._DL-VIII ZP_09206015            | 484 | TLEN..EMLLVICNF  | TGKTKFA     | FEDEIEFNSK     | ELLISNY..NADVNN       | PNIDNI.....T   | LRPYEARVYKLLI...   | 546              |     |
| 32-C.sp._DL-VIII ZP_09207308            | 484 | TLEN..EMLLVICNF  | TGKTKFA     | FEDEIEFNSK     | ELLISNY..DVDNNS       | INNI.....D     | LRPYEARVYKLLI...   | 547              |     |
| 33-L.jensenii_269-3 ZP_04645733         | 473 | VLGD..EKWLVVCF   | NLTKEEAT    | FTESEYKI...Q   | NALISNY..PAR          | TT.LQDI...T    | LKPYEARVAFACVTC... | 529              |     |
| 34-L.iners_DSM_13335 ZP_05744409        | 484 | ILGD..QKWLVVANF  | LDEKPF      | NCHEYQ...Q     | KVLVSNY..TTP          | SN.LQNI...I    | LKPYEARVAFVYVIA... | 539              |     |
| 35-L.johnsonii_DPC_6026 AEB92563        | 484 | KLED..ENWLVVANS  | LGEDQNLN    | LIDIPF...K     | EVLISNY..EKR          | DS.LKDM...V    | LKPYEARVAFVYVIA... | 538              |     |
| 36-L.johnsonii_ATCC_33200 ZP_04006730   | 521 | KLED..EKWLVVANS  | LGEDQNLN    | LIDISF...K     | KVLISNY..EKR          | DS.LKDM...V    | LKPYEARVAFVYVIA... | 575              |     |
| 37-L.gasseri_ATCC_33323 ABJ59631        | 484 | KLGS..EKWLVVANS  | LGDQRFN     | LNDNF...K      | EVLISNY..EKQ          | DS.LKNI...I    | LKPYEARVAFVYVIA... | 538              |     |
| 38-L.amylolyticus_DSM_11664 ZP_06818684 | 484 | KLNG..QKWLVVANF  | LGNEES      | SFAKDV...K     | ENIENY..DKH           | QQ.LQDL...T    | LKPYEARVAFVYVIA... | 539              |     |
| 39-L.acidophilus_NCFM G16G LBA0264      | 484 | ILND..KKWLVVANS  | LNEEQNF     | VSNQI...E      | ETLISNY..PERNN        | VQNI...T       | LKPYEARVAFVYVIA... | 539              |     |
| 40-L.amylolyticus_GRL1118 AEA31245      | 484 | VLGD..EKWLVVANS  | LGEQKFN     | SADQI...D      | QVLVANY..DER          | ND.LNDI...T    | LKPYEARVAFVYVIA... | 540              |     |
| 41-L.crispatus_ST1 CBL49714             | 484 | ILGT..EKWLVVANS  | LGEQQFT     | STDRI...K      | ENLISNY..AVR          | ND.LHDI...T    | LKPYEARVAFVYVIA... | 539              |     |
| 42-Lc.garvieae_ATCC_49156 YP_004779435  | 486 | SYKG..EDWLVVANS  | LHENQF      | SSYDV...K      | EGIMHNY..PEAIDN       | VKER...V       | LKPYEARVAFVYVIA... | 542              |     |
| 43-E.saccharolyticus_30_1 ZP_09110526   | 484 | VLDE..QKWLITNF   | QKTTTFD     | LKEEP...K      | SVLISNY..TKKEYT       | KGML...Y       | LDPYEARVAFVYVIA... | 540              |     |
| 44-E.italicus_DSM_15952 ZP_07895345     | 483 | EFSG..EKWLVVANS  | LESNQFT     | LIEEII...G     | EVLHNY..HTSLPK        | SGEV...Y       | LDPYEARVAFVYVIA... | 542              |     |
| 45-E.faecalis_T2 ZP_05424932            | 486 | TLND..EVWLVVANS  | LRNQQT      | MPGAG...K      | EVISNY..HLAELP        | QGEI...M       | LQPYEARVAFVYVIA... | 542              |     |
| 46-E.faecium_TX0133a04 ZP_07845411      | 499 | IYED..QQWLVVANS  | SEKQFT      | VPREA...L      | RVLVSNY..PLKQLP       | DGKV...D       | LRPYEARVAFVYVIA... | 555              |     |
| 47-T.halophilus_NBRC_12172 YP_004886502 | 484 | KYKG..QRWLVVANS  | SEVQPF      | SSEDEM...K     | KVLIQNT..VDEFTT       | LENI...N       | LQPYEARVAFVYVIA... | 540              |     |
| 48-E.faecalis_TX0109 ZP_07568166        | 484 | TYGE..ERWLVVANS  | SEVQPF      | SADVHV...E     | QVLIENM..PTDVT        | LADY...S       | LAPYEARVAFVYVIA... | 541              |     |
| 49-E.saburreum_DSM_3986 ZP_07905892     | 497 | TLGN..QKLVVCF    | NFSKTEQ     | KDFSGYENA...K  | VLLISNY..DGNISE       | KA...T         | LKPYEARVAFVYVIA... | 556              |     |
| 50-R.sp._5_1_39B_FAA ZP_04856921        | 500 | TLGD..EKLVVCF    | NFSENRE     | VELPEE..FTNG   | KVLISNY..IDAKVN       | HKI...T        | LRPYEARVAFVYVIA... | 556              |     |
| 51-T.thermosaccharolyticum YP_003852493 | 498 | KLND..EMLLVICNF  | TSNNAE      | FLPDNIN        | VNKNLISNY..DVANDD     | NIENF...E      | LRPYEARVAFVYVIA... | 560              |     |
| 52-C.owensensis_OL YP_004001509         | 499 | SYGN..EMLLVVANS  | SEVEF       | CAPKEIFLNK     | PELLISNY..EVEDDI      | QKI...E        | LRPYEARVAFVYVIA... | 558              |     |
| 53-O._sp._TW25 ZP_08784662              | 499 | KYED..QTLVITNF   | TGQEIAYG    | TQSEDLKRG..N   | LLIGNY..QDAPVT        | FVTSV...T      | LRPYEARVAFVYVIA... | 558              |     |
| 54-B.sp._NRR_LB-14911 ZP_01172682       | 503 | TLGS..QVLLVLCNF  | YGNTRK      | LALPEELKEIKY   | SWITGNY..GSEGRED      | IVPQ...Q       | LKPYEARVAFVYVIA... | 565              |     |
| 55-B.sp._2_A_57_CT2 ZP_08004010         | 498 | TLGN..QILLVLCNF  | YGNPEVE     | FPAYIEKFK      | EALISNY..KDIQIN       | ...RTI...T     | LRPYEARVAFVYVIA... | 558              |     |
| 56-B.halodurans_C-125 NP_243769         | 498 | TYNG..QTLVVCNF   | YGRITDF     | ECPAEIVLSEP    | TLLISNY..DEEENG       | SYTSF...R      | LRPYEARVAFVYVIA... | 561              |     |
| 57-G.thermoglucosidasius BAA01368 O16G  | 499 | TLGN..EQLIVITNF  | SEKTPVFR    | LPDHIIYKTK     | ELLISNY..DVDEAE       | EELKEI...T     | LRPYEARVAFVYVIA... | 562              |     |
| 58-B.cereus_Rock3-44 ZP_04218751        | 504 | TWRD..EKLLVIANF  | TSDSVFEL    | PEEIMYGD       | ELLIHNY..NVQDEV       | IESI...A       | LQPYEARVAFVYVIA... | 565              |     |
| 59-B.cereus_ATCC_14579 AAP10934 O16G    | 498 | TYGD..EKLLVIANF  | TADESVFEM   | PKDISYSES      | ELFIHNY..DVEIGS       | ...IDNI...T    | LRPYEARVAFVYVIA... | 558              |     |
| 60-Lis.grayi_DSM_20601 ZP_07053050      | 494 | KTKR..QDAIVLANF  | SAETIEYS    | ASLAEA...S     | ILLANT..ADFQIK        | RDHI...I       | VPPGMIYFKTKGVEK    | 554              |     |
| 61-B.coagulans_36D1 YP_004859480        | 504 | KHEG..SCAMIVCNF  | TSKLLQFT    | FCPELTHRW...A  | CLLNNS..GYHSA         | KAVPSKL...V    | LSPFECFVLLQE...    | 564              |     |
| 62-C.sp._AT7 ZP_02185859                | 503 | NFEG..QRAIVCCNF  | LSDAEEHV    | QEDGVSTVGW..Q  | ILLQNE..GNIIDK        | ...DAV...T     | FAPYGTVMFYQDDPA    | 565              |     |
| 63-C.sp._17-4 YP_004375075              | 502 | SWGS..SKAIVCCNF  | SENKQTT     | TDKLTQSY...T   | VALTNE..GNTLQE        | ...GQL...T     | KLSPYGAIVLIDL...   | 561              |     |
| 64-C.sp._AT7 ZP_02185858                | 505 | SWDS..TTVLVCCNF  | MSDETQVVS   | LVLGIKQPY...T  | IRLSNE..GNTLQE        | ...DKL...T     | TLSPYGAIVLIDL...   | 562              |     |
| 65-L.farciminis_KCTC_3681 ZP_08576747   | 497 | KTAD..KQGLVITNF  | SDQKTEFT    | LPKTV...W      | RKVLITNES..SEVEDG     | VV...T         | KLGPYGAIVLIDL...   | 552              |     |
| 66-L.pentosus_MP-10 CCB83116            | 502 | DDGT..EQAAITCNF  | LSSEMYYT    | LPFAGDA...T    | LQAQGG..ASCTER        | QV...T         | TLPAWSSIVVSPRTTVS  | 561              |     |
| 67-L.plantarum YP_003061749             | 502 | DDGQ..KQAAIVCNF  | LSAQATYLL   | PF...V         | GGK.VLLVQGG..ATYRGR   | ...V...T       | TLPAWSSIVVVKSA...  | 557              |     |
| 68-L.ruminis_SPM0211 ZP_08562977        | 501 | TLGD..SEAVVICNF  | LADAVTKYR   | VRGNLSDK...H   | IVLQNGSL              | SLNEENVL...T   | LPFGSIVFMTE...     | 559              |     |
| 69-L.animalis_KCTC_3501 ZP_08548669     | 500 | VIDEH..KQVLVITNF | SDQKTEFT    | LPKTV...K      | VLLSNG..AKVSAD        | QV...T         | KLAPYGAIVLIDL...   | 553              |     |
| 70-L.pentosus_IG1 CCC16918              | 499 | RLGK..SAVVVTCNF  | LIDQSI      | EIPMI...K      | NKTSTRF..AEGKIR       | MLEDTV...T     | SYGPAWFTIKDILED..  | 555              |     |
| 71-L.casei_ATCC_334 YP_806220           | 497 | QTDK..AIAVVAVAL  | SDKTVNLR    | LIPAGDYQA...V  | LIVGDA..TLSEET        | ...L...T       | TLSADSAWFIQEKERA   | 556              |     |
| 72-L.delbrueckii ZP_07091943            | 496 | DLGD..DRALVVVSL  | SAKKEHLT    | LPPEEL...T     | PVLTAGSIN             | LQKGL...T      | TLMPFAGVVLQKKK...  | 551              |     |
| 73-L.jensenii_27-2-CHN ZP_05557003      | 494 | DLGD..ESALVVVNL  | TNKLKVM     | TKYQ...K       | VLLSNGQYSL            | LNDEL...T      | QLAPFAGVLLRRD...   | 547              |     |
| 74-L.iners_LEAF_2053A-b ZP_07735311     | 498 | DLED..EVGIVAVSL  | SSKKEMIE    | LP...I         | GNV..DIKLT            | GTCELVNNQL...T | TLAPGSGVLLIKK...   | 553              |     |
| 75-L.gasseri_JV-V03 ZP_07058635         | 497 | NLGD..QKALVAVSL  | SKDAIELD    | VDPFKQE...K    | LVAGNY..QLKDGK        | ...L...T       | KLAPYAGVLLTKD...   | 552              |     |
| 76-L.johnsonii_FI9785 YP_003292438      | 497 | NLKD..KKALVAVSL  | QEPPIE      | EVGKEFSSE...R  | LSAGEY..DLTAGK        | ...L...T       | RLEPYAGVLLLEN...   | 551              |     |
| 77-L.amylolyticus_DSM_11664 ZP_06818628 | 497 | DLGD..ESAVVAVSL  | SPKTTVEI    | PAEYETE...V    | LSAGEY..QLNKQK        | ...L...T       | TLMPYAGVLLMRKKEN   | 555              |     |
| 78-L.helveticus_H10 ADX71102            | 502 | DLND..ESAVVAVSL  | SEKITIEI    | PAQYTEE...K    | LKAGEY..QLTNRK        | ...L...T       | TLMPYAGVLLKKNEN    | 558              |     |
| 79-L.acidophilus_NCFM LBA1872           | 495 | DLGN..ESAVVAVSL  | SNKKSID     | LPEEYIKE...L   | LKAGEY..QLTNGK        | ...L...T       | TLMPYAGVLLKKNEN    | 551              |     |
| 80-L.amylolyticus_GRL1118 AEA32747      | 496 | DLND..ESAVVAVSL  | SDKTKIK     | LIPAGYTE...V   | LKAGEY..KLTG          | ...L...T       | TLMPYAGVLLKKNEN    | 552              |     |

\*\*\* \* \* \* \* \*\* \*\*



|                                          |     |              |     |
|------------------------------------------|-----|--------------|-----|
| 1-L.plantarum ADN99864                   | 555 | .....        | 555 |
| 2-L.casei_ATCC_334 ABJ70852              | 555 | .....        | 555 |
| 3-L.rhamnosus_ATCC_8530 AER64849         | 554 | .....        | 554 |
| 4-E.italicus_DSM_15952 ZP_07895342       | 568 | ETFNEKIR.... | 575 |
| 5-L.sakei_subsp._sakei_23K YP_395811     | 549 | .....        | 549 |
| 6-P.larvae ZP_02329600                   | 560 | .....        | 560 |
| 7-T.halophilus_NBRC_12172 YP_004886688   | 553 | .....        | 553 |
| 8-B.fuscum BAB60692                      | 575 | .....        | 575 |
| 9-H.hydrogeniformans YP_003995944        | 555 | .....        | 555 |
| 10-L.pentosus_IG1 CCC17113               | 541 | .....        | 541 |
| 11-L.plantarum AD000180                  | 541 | .....        | 541 |
| 12-L.pentosus_IG1 CCC16900               | 558 | .....        | 558 |
| 13-L.plantarum ADN97379                  | 558 | .....        | 558 |
| 14-L.rhamnosus_ATCC_8530 AER65504        | 560 | .....        | 560 |
| 15-L.brevis_ATCC_367 ABJ65230            | 557 | .....        | 557 |
| 16-L.pentosus_IG1 CCC16895               | 557 | .....        | 557 |
| 17-L.plantarum ADN97381                  | 557 | .....        | 557 |
| 18-R.lactaris_ATCC_29176 ZP_03168755     | 566 | .....        | 566 |
| 19-D._formicigenerans ZP_02235523        | 565 | .....        | 565 |
| 20-R.torques_ATCC_27756 ZP_01967024      | 565 | .....        | 565 |
| 21-B.coagulans BAA11354 O16G             | 555 | .....        | 555 |
| 22-F.prausnitzii_L2-6 CBK98455           | 552 | .....        | 552 |
| 23-L.sakei_subsp._sakei_23K CAI56099     | 548 | .....        | 548 |
| 24-C.leptum_DSM_753 ZP_02079428          | 587 | ENI.....     | 589 |
| 25-S.mutans AAA26939 G16G                | 536 | .....        | 536 |
| 26-S.mitis_bv._2_str._F0392 EGR94186     | 537 | .....        | 537 |
| 27-L.pseudomesenteroides ZP_08659173     | 543 | .....        | 543 |
| 28-L.ruminis_ATCC_27782 AEN77768         | 541 | .....        | 541 |
| 29-L.delbrueckii ADQ60220                | 540 | .....        | 540 |
| 30-L.casei_LC2W AEA53469                 | 541 | .....        | 541 |
| 31-C.sp._DL-VIII ZP_09206015             | 546 | .....        | 546 |
| 32-C.sp._DL-VIII ZP_09207308             | 547 | .....        | 547 |
| 33-L.jensenii_269-3 ZP_04645733          | 529 | .....        | 529 |
| 34-L.iners_DSM_13335 ZP_05744409         | 539 | .....        | 539 |
| 35-L.johnsonii_DPC_6026 AEB92563         | 538 | .....        | 538 |
| 36-L.johnsonii_ATCC_33200 ZP_04006730    | 575 | .....        | 575 |
| 37-L.gasseri_ATCC_33323 ABJ59631         | 538 | .....        | 538 |
| 38-L.amylolyticus_DSM_11664 ZP_06818684  | 539 | .....        | 539 |
| 39-L.acidophilus_NCFM G16G LBA0264       | 539 | .....        | 539 |
| 40-L.amylovorus_GRL1118 AEA31245         | 540 | .....        | 540 |
| 41-L.crispatum_ST1 CBL49714              | 539 | .....        | 539 |
| 42-Lc.garvieae_ATCC_49156 YP_004779435   | 542 | .....        | 542 |
| 43-E.saccharolyticus_30_1 ZP_09110526    | 540 | .....        | 540 |
| 44-E.italicus_DSM_15952 ZP_07895345      | 542 | .....        | 542 |
| 45-E.faecalis_T2 ZP_05424932             | 542 | .....        | 542 |
| 46-E.faecium_TX0133a04 ZP_07845411       | 555 | .....        | 555 |
| 47-T.halophilus_NBRC_12172 YP_004886502  | 540 | .....        | 540 |
| 48-E.faecalis_TX0109 ZP_07568166         | 541 | .....        | 541 |
| 49-E.saburreum_DSM_3986 ZP_07905892      | 557 | M.....       | 557 |
| 50-R.sp._5_1_39B_FAA ZP_04856921         | 556 | .....        | 556 |
| 51-T.thermosaccharolyticum YP_003852493  | 560 | .....        | 560 |
| 52-C.owensensis_OL YP_004001509          | 558 | .....        | 558 |
| 53-O._sp._TW25 ZP_08784662               | 558 | .....        | 558 |
| 54-B.sp._NRRL_B-14911 ZP_01172682        | 565 | .....        | 565 |
| 55-B.sp._2_A_57_CT2 ZP_08004010          | 558 | .....        | 558 |
| 56-B.halodurans_C-125 NP_243769          | 561 | .....        | 561 |
| 57-G.thermoglucoasidiasius BAA01368 O16G | 562 | .....        | 562 |
| 58-B.cereus_Rock3-44 ZP_04218751         | 565 | .....        | 565 |
| 59-B.cereus_ATCC_14579 AAP10934 O16G     | 558 | .....        | 558 |
| 60-Lis.grayi_DSM_20601 ZP_07053050       | 554 | .....        | 554 |
| 61-B.coagulans_36D1 YP_004859480         | 564 | .....        | 564 |
| 62-C.sp._AT7 ZP_02185859                 | 566 | DTIPIEDEHLEN | 577 |
| 63-C.sp._17-4 YP_004375075               | 561 | .....        | 561 |
| 64-C.sp._AT7 ZP_02185858                 | 562 | .....        | 562 |
| 65-L.farciminis_KCTC_3681 ZP_08576747    | 552 | .....        | 552 |
| 66-L.pentosus_MP-10 CCB83116             | 562 | A.....       | 562 |
| 67-L.plantarum YP_003061749              | 557 | .....        | 557 |
| 68-L.ruminis_SPM0211 ZP_08562977         | 559 | .....        | 559 |
| 69-L.animalis_KCTC_3501 ZP_08548669      | 553 | .....        | 553 |
| 70-L.pentosus_IG1 CCC16918               | 555 | .....        | 555 |
| 71-L.casei_ATCC_334 YP_806220            | 557 | KP.....      | 558 |
| 72-L.delbrueckii ZP_07091943             | 551 | .....        | 551 |
| 73-L.jensenii_27-2-CHN ZP_05557003       | 547 | .....        | 547 |
| 74-L.iners_LEAF_2053A-b ZP_07735311      | 553 | .....        | 553 |
| 75-L.gasseri_JV-V03 ZP_07058635          | 552 | .....        | 552 |
| 76-L.johnsonii_FI9785 YP_003292438       | 551 | .....        | 551 |
| 77-L.amylolyticus_DSM_11664 ZP_06818628  | 555 | .....        | 555 |
| 78-L.helveticus_H10 ADX71102             | 558 | .....        | 558 |
| 79-L.acidophilus_NCFM LBA1872            | 551 | .....        | 551 |
| 80-L.amylovorus_GRL1118 AEA32747         | 552 | .....        | 552 |
| consensus                                |     |              |     |

FIG S1 Multiple sequence alignment of characterised GH13\_31 enzymes and sequences from BLASTP with LBA0264 and LBA1872. The green boxes indicate conserved regions I, II, III and IV of  $\alpha$ -amylase family enzymes (GH clan H) encompassing the catalytic groups and some -1 subsite residues of the active site cleft (4). The blue box indicates region V, which defines the specificity motifs of the 1,6- $\alpha$ -glucosidases and neopullulanases (5). The catalytic residues are marked with arrows. The sequence numbering on top corresponds to LaGH13\_31 (LBA0264). Similar residues are highlighted in pink, conserved residues are highlighted in blue ( $\geq 50\%$  conserved) or purple ( $\geq 75\%$  conserved).

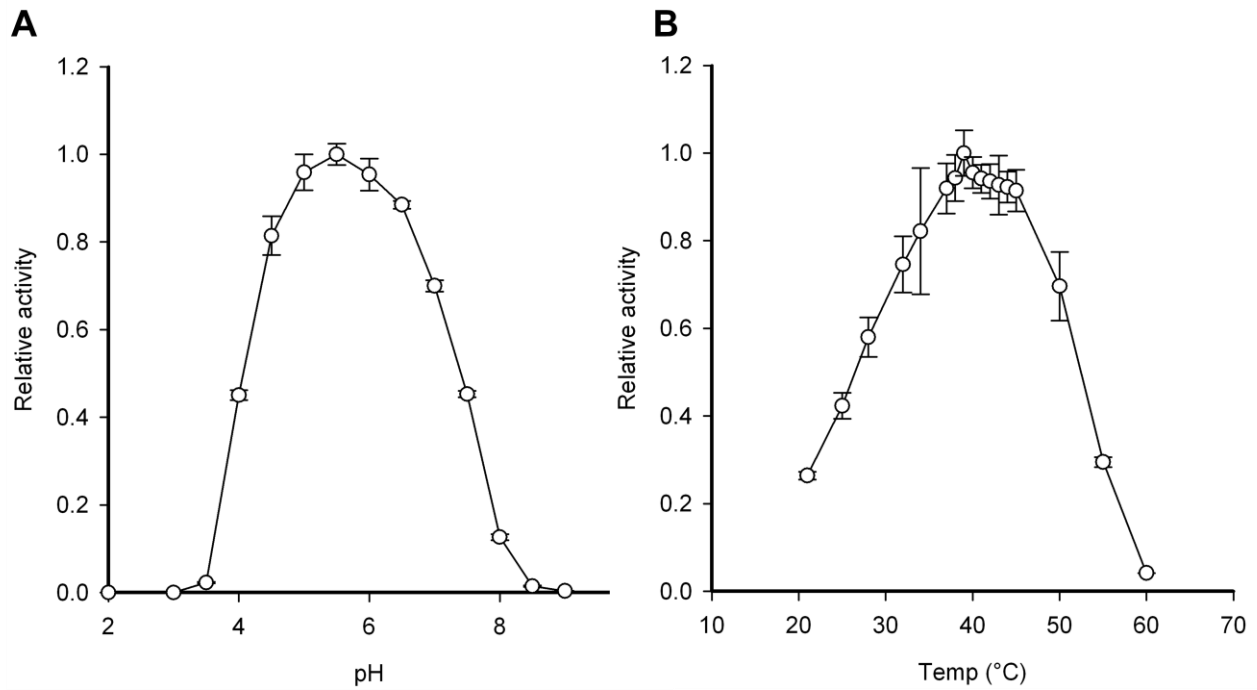

**FIG S2** Activity optima of *LaGH13\_31*. **(A)** pH activity optimum of *LaGH13\_31* at 37°C, where a relative activity of 1 corresponds to a specific activity of 351 U/mg enzyme **(B)** Temperature activity optimum of *LaGH13\_31* at pH 6.0, where 1 corresponds to 393.5 U/mg enzyme. The data is depicted as means of triplicates  $\pm$  standard deviation using 2 mM *p*-nitrophenyl  $\alpha$ -D-glucopyranoside (*p*NPG) as a substrate.

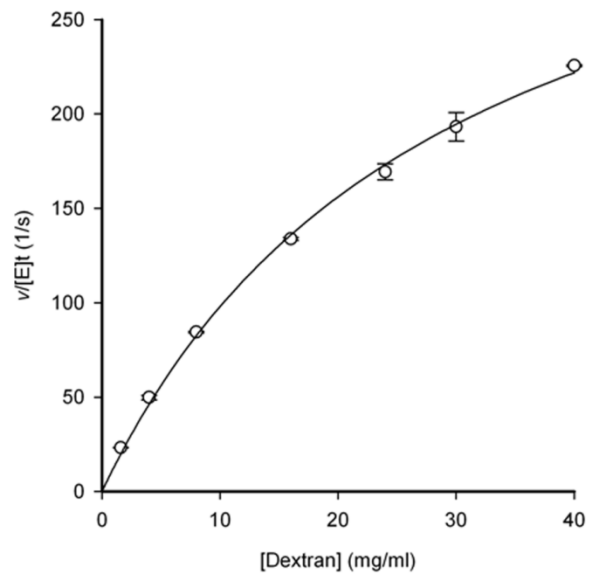

**FIG S3** Michaelis-Menten plot of the Kinetics of dextran hydrolysis by *LaGH13\_31*. The circles represent means of triplicates of the initial rates and the error bars represent the standard deviation of the data. The solid line is the Michaelis-Menten fit to the initial rate data.

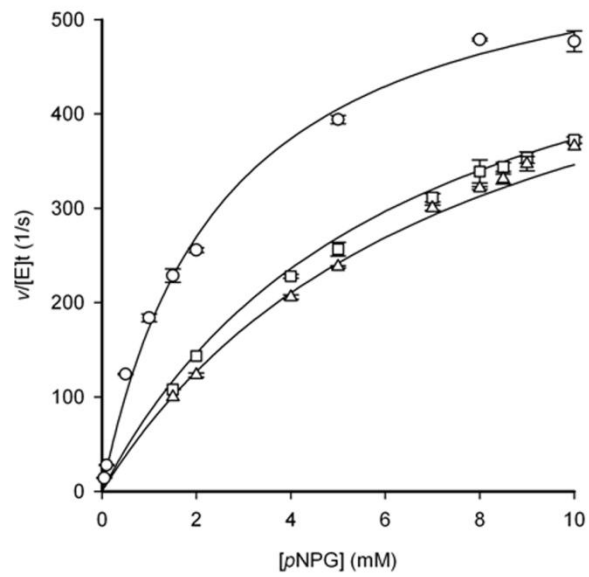

**FIG S4** Glucose inhibition of *LaGH13\_31*. *pNPG* without glucose addition ( $\circ$ ), 6 mM glucose ( $\square$ ), and 8 mM glucose ( $\Delta$ ). The data is depicted as means of triplicates and the solid lines represent global fits of the Michaelis-Menten model with a competitive inhibition term to the initial rate data.

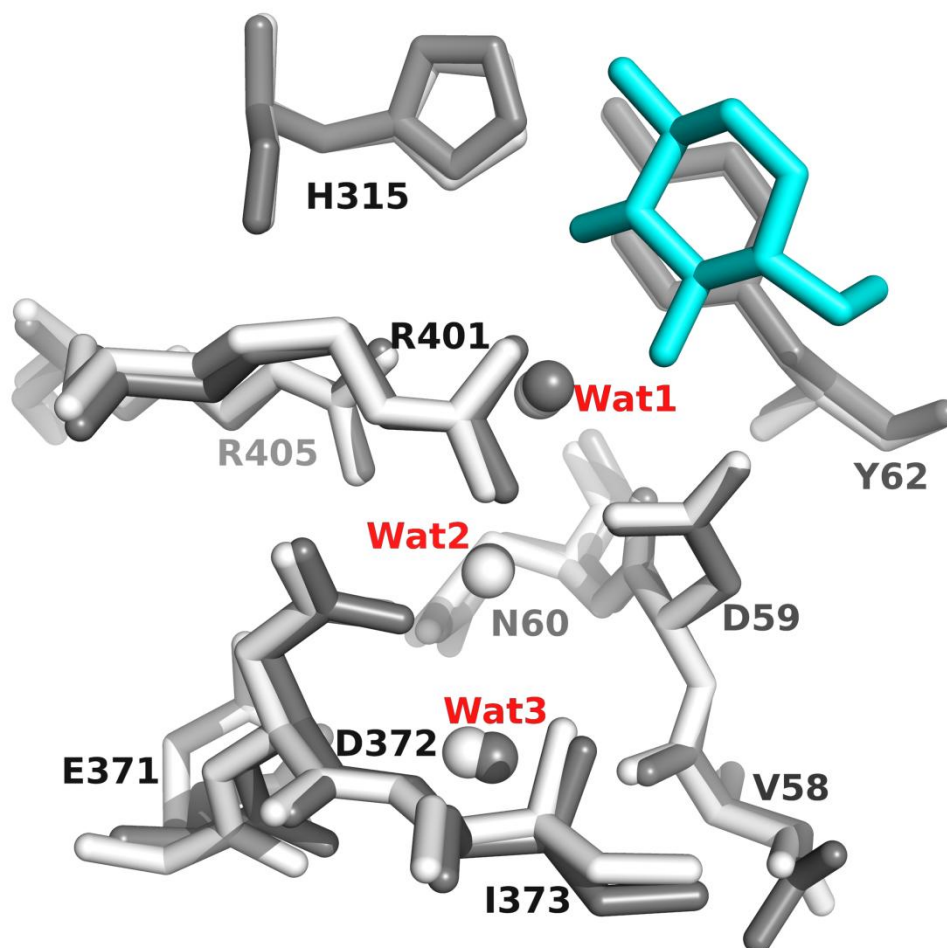

**FIG S5** The figure depicts the conserved water path identified in *SmGH13\_31* by Hondoh et al 2008, and proposed to be functionally important as an active site water drain facilitating the exit of water molecules upon substrate binding to the active site. *LaGH13\_31* residues and bound water molecules are in white and *SmGH13\_31* in grey. *LaGH13\_31* residues are labeled and the three waters making the path to the surface of the enzyme are labeled in red. The glucose moiety of IG3 in the *SmGH13\_31* -1 subsite is shown in cyan. This observation confirms the conservation of the water path of this class of enzymes.

**TABLE S1** Primers used for semi-quantitative RT-PCR.

| <b>Target genes<br/>(locus tag number)</b> | <b>Primer sequence (5'→3')<br/>(+) sense and (-) antisense</b>   |
|--------------------------------------------|------------------------------------------------------------------|
| 0264                                       | (+) GAAGAGTTGATTCATGCAATCAATG<br>(-) CATTCAAATGCGATAATAAGCAAG    |
| 1866                                       | (+) TGCTGAAAGCTTAGACTTGTTGTAG<br>(-) CAAGAACATTAAGGTTTCGTGTTGTAC |
| 1867                                       | (+) TCTGTCAGCCAAAGTCATCG<br>(-) CAAAGACAGCGTGTTGCATTAG           |
| 1872                                       | (+) CCATGGATGTTGATCTGAAGTATG<br>(-) ATGTCACATTGGTACGATCATGC      |
| 2071                                       | (+) TAAGGTTCTTCGCGTTGCTT<br>(-) CATGGGTAGCGAACAGGATT             |

**TABLE S2** Amino acid sequence comparison of LBA1872 to functionally characterised GH13 enzymes. The similarity of amino acid sequence was investigated using the BLASTP program (UniProtKB/Swiss-Prot database). The proteins are enlisted according to descending identity and grouped according to specificity indicated in bold text in the first column.

|                                                                                   | UniProtKB<br>/Swiss-Prot<br>accession<br>no. | Identity<br>(%) | Similarity<br>(%) | Gaps | Score | References   |
|-----------------------------------------------------------------------------------|----------------------------------------------|-----------------|-------------------|------|-------|--------------|
| <b>Oligo 1,6-<math>\alpha</math>-glucosidase</b>                                  |                                              |                 |                   |      |       |              |
| <i>Bacillus cereus</i>                                                            | P21332 <sup>a</sup>                          | 34.1            | 55.1              | 4.1  | 956   | (10, 11, 13) |
| <i>Bacillus thermoglucosidasius</i><br>( <i>Geobacillus thermoglucosidasius</i> ) | P29094 <sup>a</sup>                          | 35.9            | 54.5              | 5.1  | 950   | (12)         |
| <i>Bacillus coagulans</i>                                                         | Q45101 <sup>b</sup>                          | 35.6            | 55.2              | 3.2  | 936   | (9)          |
| <i>Saccharomyces cerevisiae</i><br>( <i>Isomaltase</i> )                          | P53051 <sup>b</sup>                          | 29.7            | 46.6              | 14.9 | 649   | (14)         |
| <b>Trehalose-6-phosphate hydrolase</b>                                            |                                              |                 |                   |      |       |              |
| <i>Bacillus subtilis</i>                                                          | P39795 <sup>c</sup>                          | 34.1            | 52.7              | 9.6  | 870   | (2)          |
| <i>Escherichia coli</i> (strain K12)                                              | P28904 <sup>c</sup>                          | 33.3            | 50.3              | 10.7 | 819   | (6)          |
| <b>Glucan 1,6-<math>\alpha</math>-glucosidase</b>                                 |                                              |                 |                   |      |       |              |
| <i>Streptococcus mutans</i>                                                       | Q99040 <sup>a</sup>                          | 35.1            | 52.4              | 10.3 | 844   | (3, 7, 8)    |
| <i>Candida albicans</i> (Yeast)                                                   | Q02751 <sup>b</sup>                          | 30.4            | 49.3              | 15.0 | 675   | (1)          |

<sup>a</sup>GH13 subfamily 31; <sup>b</sup>GH13 no subfamily assigned; <sup>c</sup>GH13 subfamily 29

**TABLE S3** Source organisms and accession numbers of sequences included in the multiple sequence alignment and phylogenetic tree (Fig. 2 and Fig. S1). The sequences are numbered according to Fig. 2 and Fig. S1; The different clusters in Fig. 2 are highlighted: Unknown specificity 2 in light green, Unknown specificity 1 including LBA1872 from *L. acidophilus* NCFM in light blue, the ancestral putative oligo 1,6- $\alpha$ -glucosidase in white, Glucan 1,6- $\alpha$ -glucosidases in dark grey, and oligo 1,6- $\alpha$ -glucosidases in light grey.

| #  | Group                              | Accession ID (links) | Organism name                                                             |
|----|------------------------------------|----------------------|---------------------------------------------------------------------------|
| 1  |                                    | ADN99864             | <i>Lactobacillus plantarum</i> subsp. <i>plantarum</i> ST-III             |
| 2  |                                    | ABJ70852             | <i>Lactobacillus casei</i> ATCC 334                                       |
| 3  | Unknown specificity 2              | AER64849             | <i>Lactobacillus rhamnosus</i> ATCC 8530                                  |
| 4  |                                    | ZP_07895342          | <i>Enterococcus italicus</i> DSM 15952                                    |
| 7  |                                    | YP_004886688         | <i>Tetragenococcus halophilus</i> NBRC 12172                              |
| 60 |                                    | ZP_07053050          | <i>Listeria grayi</i> DSM 20601                                           |
| 65 |                                    | ZP_08576747          | <i>Lactobacillus farciminis</i> KCTC 3681                                 |
| 68 |                                    | ZP_08562977          | <i>Lactobacillus ruminis</i> SPM0211                                      |
| 69 |                                    | ZP_08548669          | <i>Lactobacillus animalis</i> KCTC 3501                                   |
| 66 |                                    | CCB83116             | <i>Lactobacillus pentosus</i> MP-10                                       |
| 67 |                                    | YP_003061749         | <i>Lactobacillus plantarum</i> JDM1                                       |
| 70 |                                    | CCC16918             | <i>Lactobacillus pentosus</i> IG1                                         |
| 71 |                                    | YP_806220            | <i>Lactobacillus casei</i> ATCC 334                                       |
| 74 |                                    | ZP_07735311          | <i>Lactobacillus iners</i> LEAF 2053A-b                                   |
| 75 |                                    | ZP_07058635          | <i>Lactobacillus gasserii</i> JV-V03                                      |
| 76 | Unknown specificity 1              | YP_003292438         | <i>Lactobacillus johnsonii</i> F19785                                     |
| 77 |                                    | ZP_06818628          | <i>Lactobacillus amylolyticus</i> DSM 11664                               |
| 78 |                                    | ADX71102             | <i>Lactobacillus helveticus</i> H10                                       |
| 79 |                                    | AAV43672             | <i>Lactobacillus acidophilus</i> NCFM                                     |
| 80 |                                    | AEA32747             | <i>Lactobacillus amylovorus</i> GRL1118                                   |
| 73 |                                    | ZP_05557003          | <i>Lactobacillus jensenii</i> 27-2-CHN                                    |
| 72 |                                    | ZP_07091943          | <i>Lactobacillus delbrueckii</i> subsp. <i>bulgaricus</i> PB2003/044-T3-4 |
| 62 |                                    | ZP_02185859          | <i>Carnobacterium</i> sp. AT7                                             |
| 63 |                                    | YP_004375075         | <i>Carnobacterium</i> sp. 17-4                                            |
| 64 |                                    | ZP_02185858          | <i>Carnobacterium</i> sp. AT7                                             |
| 61 |                                    | YP_004859480         | <i>Bacillus coagulans</i> 36D1                                            |
| 9  |                                    | YP_003995944         | <i>Halanaerobium hydrogeniformans</i>                                     |
| 10 |                                    | CCC17113             | <i>Lactobacillus pentosus</i> IG1                                         |
| 11 |                                    | ADO00180             | <i>Lactobacillus plantarum</i> subsp. <i>plantarum</i> ST-III             |
| 23 |                                    | CAI56099             | <i>Lactobacillus sakei</i> subsp. <i>sakei</i> 23K                        |
| 29 |                                    | ADQ60220             | <i>Lactobacillus delbrueckii</i> subsp. <i>bulgaricus</i> ND02            |
| 33 |                                    | ZP_04645733          | <i>Lactobacillus jensenii</i> 269-3                                       |
| 34 |                                    | ZP_05744409          | <i>Lactobacillus iners</i> DSM 13335                                      |
| 35 |                                    | AEB92563             | <i>Lactobacillus johnsonii</i> DPC 6026                                   |
| 36 |                                    | ZP_04006730          | <i>Lactobacillus johnsonii</i> ATCC 33200                                 |
| 37 |                                    | ABJ59631             | <i>Lactobacillus gasserii</i> ATCC 33323                                  |
| 38 |                                    | ZP_06818684          | <i>Lactobacillus amylolyticus</i> DSM 11664                               |
| 39 |                                    | AAV42157             | <i>Lactobacillus acidophilus</i> NCFM                                     |
| 40 |                                    | AEA31245             | <i>Lactobacillus amylovorus</i> GRL1118                                   |
| 41 |                                    | CBL49714             | <i>Lactobacillus crispatus</i> ST1                                        |
| 30 | Glucan 1,6- $\alpha$ -glucosidases | AEA53469             | <i>Lactobacillus casei</i> LC2W                                           |
| 25 |                                    | AAA26939             | <i>Streptococcus mutans</i> UA159                                         |
| 26 |                                    | EGR94186             | <i>Streptococcus mitis</i> bv. 2 str. F0392                               |
| 27 |                                    | ZP_08659173          | <i>Leuconostoc pseudomesenteroides</i> KCTC 3652                          |
| 42 |                                    | YP_004779435         | <i>Lactococcus garvieae</i> ATCC 49156                                    |
| 47 |                                    | YP_004886502         | <i>Tetragenococcus halophilus</i> NBRC 12172                              |
| 48 |                                    | ZP_07568166          | <i>Enterococcus faecalis</i> TX0109                                       |
| 43 |                                    | ZP_09110526          | <i>Enterococcus saccharolyticus</i> 30 1                                  |
| 44 |                                    | ZP_07895345          | <i>Enterococcus italicus</i> DSM 15952                                    |
| 45 |                                    | ZP_05424932          | <i>Enterococcus faecalis</i> T2                                           |
| 46 |                                    | ZP_07845411          | <i>Enterococcus faecium</i> TX0133a04                                     |
| 28 |                                    | AEN77768             | <i>Lactobacillus ruminis</i> ATCC 27782                                   |
| 31 |                                    | ZP_09206015          | <i>Clostridium</i> sp. DL-VIII                                            |
| 32 |                                    | ZP_09207308          | <i>Clostridium</i> sp. DL-VIII                                            |
| 8  |                                    | BAB60692             | <i>Brevibacterium fuscum</i> var. <i>dextranlyticum</i>                   |
| 5  |                                    | YP_395811            | <i>Lactobacillus sakei</i> subsp. <i>sakei</i> 23K                        |
| 6  |                                    | ZP_02329600          | <i>Paenibacillus larvae</i> subsp. <i>larvae</i> BRL-230010               |
| 12 |                                    | CCC16900             | <i>Lactobacillus pentosus</i> IG1                                         |
| 13 |                                    | ADN97379             | <i>Lactobacillus plantarum</i> subsp. <i>plantarum</i> ST-III             |
| 14 |                                    | AER65504             | <i>Lactobacillus rhamnosus</i> ATCC 8530                                  |
| 15 |                                    | ABJ65230             | <i>Lactobacillus brevis</i> ATCC 367                                      |
| 16 |                                    | CCC16895             | <i>Lactobacillus pentosus</i> IG1                                         |
| 17 |                                    | ADN97381             | <i>Lactobacillus plantarum</i> subsp. <i>plantarum</i> ST-III             |
| 18 |                                    | ZP_03168755          | <i>Ruminococcus lactaris</i> ATCC 29176                                   |
| 19 |                                    | ZP_02235523          | <i>Dorea formicigenerans</i> ATCC 27755                                   |
| 20 |                                    | ZP_01967024          | <i>Ruminococcus torques</i> ATCC 27756                                    |
| 22 |                                    | CBK98455             | <i>Faecalibacterium prausnitzii</i> L2-6                                  |
| 24 | Oligo 1,6- $\alpha$ -glucosidases  | ZP_02079428          | <i>Clostridium leptum</i> DSM 753                                         |
| 49 |                                    | ZP_07905892          | <i>Eubacterium saburreum</i> DSM 3986                                     |
| 50 |                                    | ZP_04856921          | <i>Ruminococcus</i> sp. 5 1 39B FAA                                       |
| 51 |                                    | YP_003852493         | <i>Thermoanaerobacterium thermosaccharolyticum</i> DSM 571                |
| 52 |                                    | YP_004001509         | <i>Caldicellulosiruptor owensensis</i> OL                                 |
| 53 |                                    | ZP_08784662          | <i>Ornithinibacillus</i> sp. TW25                                         |
| 54 |                                    | ZP_01172682          | <i>Bacillus</i> sp. NRRL B-14911                                          |
| 55 |                                    | ZP_08004010          | <i>Bacillus</i> sp. 2 A 57 CT2                                            |
| 56 |                                    | NP_243769            | <i>Bacillus halodurans</i> C-125                                          |
| 57 |                                    | BAA01368             | <i>Geobacillus thermoglucosidasius</i>                                    |
| 58 |                                    | ZP_04218751          | <i>Bacillus cereus</i> Rock3-44                                           |
| 59 |                                    | AAP10934             | <i>Bacillus cereus</i> ATCC 14579                                         |
| 21 |                                    | BAA11354             | <i>Bacillus coagulans</i>                                                 |



## REFERENCES

1. Geber, A., P. R. Williamson, J. H. Rex, E. C. Sweeney, and J. E. Bennett. 1992. Cloning and Characterization of a *Candida-albicans* maltase gene involved in sucrose utilization. *J. Bacteriol.* **174**:6992–6996.
2. Gotsche, S. and M. K. Dahl. 1995. Purification and characterization of the phospho- $\alpha$ (1,1)glucosidase (treA) of *Bacillus-subtilis*-168. *J. Bacteriol.* **177**:2721–2726.
3. Hondoh, H., W. Saburi, H. Mori, M. Okuyama, T. Nakada, Y. Matsuura, and A. Kimura. 2008. Substrate recognition mechanism of  $\alpha$ -1,6-glucosidic linkage hydrolyzing enzyme, dextran glucosidase from *Streptococcus mutans*. *J. Mol. Biol.* **378**:913–922.
4. MacGregor, E. A., S. Janecek, and B. Svensson. 2001. Relationship of sequence and structure to specificity in the  $\alpha$ -amylase family of enzymes. *Biochim. Biophys. Acta Protein Struc. Mol. Enzymol.* **1546**:1–20.
5. Oslancova, A. and S. Janecek. 2002. Oligo-1,6-glucosidase and neopullulanase enzyme subfamilies from the  $\alpha$ -amylase family defined by the fifth conserved sequence region. *Cell. Mol. Life Sci.* **59**:1945–1959.
6. Rimmele, M. and W. Boos. 1994. Trehalose-6-phosphate hydrolase of *Escherichia coli*. *J. Bacteriol.* **176**:5654–5664.
7. Saburi, W., H. Hondoh, Y. M. Kim, H. Mori, M. Okuyama, and A. Kimura. 2008. Structure-function relationship of substrate length specificity of dextran glucosidase from *Streptococcus mutans*. *Biologia* **63**:1000–1005.
8. Saburi, W., H. Mori, S. Saito, M. Okuyama, and A. Kimura. 2006. Structural elements in dextran glucosidase responsible for high specificity to long chain substrate. *Biochim. Biophys. Acta Proteins Proteom.* **1764**:688–698.
9. Suzuki, Y. and Y. Tomura. 1986. Purification and characterization of *Bacillus coagulans* oligo-1,6-glucosidase. *Eur. J. Biochem.* **158**:77–83.
10. Suzuki, Y., R. Aoki, and H. Hayashi. 1982. Assignment of a para-nitrophenyl- $\alpha$ -D-glucopyranoside-hydrolyzing  $\alpha$ -glucosidase of *Bacillus cereus* ATCC 7064 to an exo-oligo-1,6-glucosidase. *Biochim. Biophys. Acta* **704**:476–483.
11. Watanabe, K., K. Miyake, and Y. Suzuki. 2001. Identification of catalytic and substrate-binding site residues in *Bacillus cereus* ATCC7064 oligo-1,6-glucosidase. *Biosci. Biotechnol. Biochem.* **65**:2058–2064.
12. Watanabe, K., H. Fujiwara, K. Inui, and Y. Suzuki. 2002. Oligo-1,6-glucosidase from a thermophile, *Bacillus thermoglucosidasius* KP 1006, was efficiently produced by combinatorial expression of GroEL in *Escherichia coli*. *Biotechnol. Appl. Biochem.* **35**:35–43.
13. Watanabe, K., Y. Hata, H. Kizaki, Y. Katsube, and Y. Suzuki. 1997. The refined crystal structure of *Bacillus cereus* oligo-1,6-glucosidase at 2.0 angstrom resolution: Structural characterization of proline-substitution sites for protein thermostabilization. *J. Mol. Biol.* **269**:142–153.
14. Yamamoto, K., A. Nakayama, Y. Yamamoto, and S. Tabata. 2004. Val216 decides the substrate specificity of  $\alpha$ -glucosidase in *Saccharomyces cerevisiae*. *Eur. J. Biochem.* **271**:3414–3420.
